# *Fusobacterium nucleatum* host cell binding and invasion induces IL-8 and CXCL1 secretion that drives colorectal cancer cell migration

Michael A. Casasanta<sup>1,&</sup>, Christopher C. Yoo<sup>1,&</sup>, Barath Udayasuryan<sup>2,&</sup>, Blake E. Sanders<sup>1</sup>, Ariana Umaña<sup>1</sup>, Yao Zhang<sup>3</sup>, Huaiyao Peng<sup>2</sup>, Alison J. Duncan<sup>1</sup>, Yueying Wang<sup>1</sup>, Liwu Li<sup>3</sup>, Scott S. Verbridge<sup>2</sup>, Daniel J. Slade<sup>1,#</sup>

<sup>1</sup>Virginia Polytechnic Institute and State University, Department of Biochemistry, Blacksburg, VA, USA.

<sup>2</sup>Laboratory of Integrative Tumor Ecology, and Virginia Tech – Wake Forest School of Biomedical Engineering and Sciences, Blacksburg, VA, USA

<sup>3</sup>Virginia Polytechnic Institute and State University, Department of Biological Sciences, Blacksburg, VA, USA.

& These authors contributed equally.

# To whom correspondence should be addressed: Dr. Daniel J. Slade, Department of Biochemistry, Virginia Polytechnic Institute and State University, Blacksburg, VA 24061. Telephone: +1 (540) 231-2842. Email: [dslade@vt.edu](mailto:dslade@vt.edu)

**KEYWORDS:** *Fusobacterium nucleatum*, Fap2, FadA, autotransporter, Type V secretion, colorectal cancer, host-pathogen, neutrophil, macrophage, inflammation, CRC, IL-8, CXCL1, CCL3, CXCL2, metastasis, tumor microenvironment, cytokine

---

*Fusobacterium nucleatum* is implicated in the acceleration of colorectal cancer (CRC), yet the mechanisms by which this bacterium modulates the tumor microenvironment remain understudied. Here we show that binding and cellular invasion of CRC cells selectively induces the secretion of the pro-inflammatory and metastatic cytokines IL-8 and CXCL1, which we then show induces robust migration of HCT116 cancer cells. Next, we demonstrate that cytokine signaling by cancer cells is largely driven by invasion coordinated by the surface adhesin Fap2. By contrast, we show that *F. nucleatum* induced secretion of CCL3, CXCL2, and TNF $\alpha$  cytokines from neutrophils and macrophages is Fap2 independent. Finally, we show that inhibiting *F. nucleatum* host-cell binding and entry using galactose sugars, neutralizing membrane antibodies, and deletion of the *fap2* gene, lead to attenuated cytokine secretion and cellular migration. As elevated IL-8 and CXCL1 levels in cancer have been associated with increased metastatic potential and cell seeding, poor prognosis, and enhanced recruitment of tumor-associated macrophages and fibroblasts within tumor microenvironments, these data show that *F. nucleatum* directly and indirectly modulates immune and cancer cell signaling and migration. In conclusion, as viable *F. nucleatum* were previously shown to migrate within metastatic CRC cells, we propose that inhibition of host cell binding and invasion, potentially through vaccination or novel galactoside compounds, could be an effective strategy for reducing *F. nucleatum*-induced signaling that drives metastasis and cancer cell seeding.

---

## INTRODUCTION

The role of bacteria and viruses in the onset and progression of diverse cancers is well established (1–3). Recent studies on the oral, anaerobic, gram-negative bacterium *Fusobacterium nucleatum* in the acceleration of CRC pathogenesis have revealed as many questions as they have answered for the mechanisms and proteins this bacterium uses to potentiate disease (4–9). An overarching question in the field is: How does *F. nucleatum* enter and reside in tumors after likely arriving via the bloodstream from its native oral cavity? In addition, a second theme of pathogenesis that remains understudied is: Are these bacteria capable of leaving the primary tumor or within immune or cancerous cells to seed and accelerate metastatic cancer sites (10)? Answering these questions will be key in understanding both the host and bacterial mechanisms at play in

51 microbe-accelerated cancers. Two recent studies reported that *F. nucleatum* directly induces cancer cell  
52 metastasis through NF- $\kappa$ B increased expression of Keratin 7 (KRT7) (11), as well as increased expression of  
53 caspase activation and recruitment domain 3 (CARD3), and downregulation of E-cadherin (12). Herein we add  
54 to the mechanisms used by *F. nucleatum* to induce cellular migration. We show that direct binding and  
55 invasion of host cancer and immune cells by *F. nucleatum* induces the secretion of the proinflammatory and  
56 prometastatic cytokines IL-8 and CXCL1, and that conditioned media from *F. nucleatum* infected HCT116 CRC  
57 cells causes non-*Fusobacterium* exposed cells to migrate towards this cytokine rich media.

58 Chemokines/cytokines play a crucial role in tumor initiation, progression, and metastasis (13). Initially  
59 discovered as chemotactic mediators of leukocytes, they are now known to be secreted by several cell types  
60 and can be expressed constitutively or induced by inflammatory stimuli, including bacterial infections, and  
61 function in a variety of roles including cell survival, proliferation, angiogenesis, and cell migration. In cancer,  
62 chemokines mainly function in regulating angiogenesis, activating tumor-specific immune responses, and  
63 directly stimulating the tumor through autocrine or paracrine mechanisms (13).

64 The cytokines IL-8 (CXCL8) and CXCL1 (GRO $\alpha$ ) are well known to play a pivotal role in CRC  
65 progression. Multiple studies have indicated their important role in influencing CRC invasiveness. Elevated  
66 CXCL1 is correlated with cancer progression and metastasis and ultimately poor prognosis in patients with  
67 CRC; thus indicating its possible role as a biomarker for CRC (14). CXCL1 is an autocrine growth factor that  
68 binds to the receptor CXCR2 with high affinity. Many colorectal adenocarcinoma cell lines (LS174T, KM12L4,  
69 KM12C, SW480, HT29, and Caco2) constitutively express CXCL1, and it is well known that high levels of this  
70 cytokine increase invasive potential (15). Additionally, anti-CXCL1 or anti-CXCR2 antibodies have been shown  
71 to inhibit colon cancer cell proliferation (16). It is relevant for these studies that non-metastatic Caco2 and  
72 low-metastatic HT29 cell lines expressed lower levels of CXCL1 than the highly metastatic cancer cell line  
73 LS147T. In another study, Ogata et al. showed that CXCL1 increases the number of invasive DLD-1 and LoVo  
74 cells, and that these effects are quenched in the presence of anti-CXCL1 antibody (17). Furthermore, there is  
75 emerging evidence to indicate that CXCL1 participates in premetastatic niche formation in liver tissue which in  
76 turn recruits CXCR2-positive myeloid-derived suppressor cells (MDSC) to support liver metastases of CRC  
77 (18).

78 IL-8 is a ubiquitously prevalent cytokine in CRC where it has been characterized as the most potent  
79 neutrophil chemoattractant and activator in both *in vivo* and *in vitro* studies. Rubie et al. has shown that both  
80 IL-8 mRNA and protein expression were significantly upregulated in pathological colorectal tissues as well as  
81 enhanced in colorectal liver metastasis (19). Chen et al. showed that IL-8 and its receptor CXCR2 were highly  
82 upregulated in colon cancer (20). Additionally, Lee et al. showed that elevated levels of IL-8 in the serum and  
83 tumor microenvironment had enhanced the growth of human and mouse colon cancer cells while promoting  
84 the extravasation of cancer cells to lung and liver (21). IL-8 can bind to both CXCR1 and CXCR2, but it exerts  
85 different effects upon binding to either receptor (22). Binding to CXCR1 induces neutrophil migration, whereas  
86 binding to CXCR2 modulates angiogenic activity (13). The angiogenic effect of IL-8 promotes tumor growth by  
87 providing access to oxygen and nutrients, as well as an opportunity to metastasize.

88 Our initial goal was to investigate the role of outer membrane adhesins in *F. nucleatum* direct binding  
89 and invasion of cancer cells to determine if this was critical for altered cell signaling. Multiple adhesins have  
90 been characterized in *F. nucleatum* binding and signaling, with important roles for the small multimeric adhesin  
91 FadA in E-cadherin interactions and Wnt signaling that drives cellular proliferation (6, 23). Additional  
92 experiments uncovered the critical role of the large, outer membrane adhesin Fap2, a member of the Type 5a  
93 autotransporter protein family (23–25). This protein docks with host cells through Gal/GalNAc sugar residues  
94 overexpressed on CRC cells, as well as protein-protein interactions with TIGIT on natural killer cells (26).  
95 However, aside from these two adhesins, most outer membrane proteins of *F. nucleatum* have not been  
96 characterized in cancer cell interactions. We have expanded upon these analyses by developing a new,  
97 modified version of a galactose kinase markerless gene deletion system capable of creating strains with  
98 unlimited gene deletions. We implemented this system to functionally characterize the role of the Type 5a  
99 autotransporter adhesin Fap2, multiple uncharacterized Type 5c trimeric autotransporter adhesins (CbpF,  
100 FvcB, FvcC, FvcD) (27, 28), and the small, non-autotransporter multimeric adhesin FadA. Our studies reveal  
101 that binding and invasion of HCT116 CRC cells by *F. nucleatum*, which can be inhibited by small molecules,  
102 antibodies, or adhesin gene deletions, is critical to induce pro-inflammatory signaling cascades as well as  
103 cellular migration.

Through the results presented here we propose that *F. nucleatum* modulates the tumor microenvironment through interactions with both CRC and immune cells, thereby leading to the secretion of cytokines that have been well characterized for their pro-oncogenic, metastatic, and immune cell recruitment functions. Our results show how a bacterium may accelerate but not initiate cancer, and how these cytokines could allow long-term, low bacterial load infections within tumors to propagate autocrine and paracrine signaling, leading to *F. nucleatum*-loaded cancer cells that initiate cellular seeding at distant sites including the liver.

## RESULTS

### ***F. nucleatum* 23726 outer membrane adhesins are critical for the binding and invasion of HCT116 CRC cells.**

Previous studies have established that *F. nucleatum* is highly invasive and can undergo a non-obligate intracellular life stage within epithelial, endothelial, keratinocytes, and potentially immune cells (29–32). We confirm the invasive potential of *F. nucleatum* subsp. *nucleatum* ATCC 23726 into HCT116 CRC cells using fluorescence microscopy (Fig 1A–C), imaging flow cytometry (Fig. 1D), and classic flow cytometry (Fig 1E) to validate our forthcoming experiments evaluating specific proteins in this invasion process.

To gain a deeper understanding of how *F. nucleatum* is contributing to the acceleration of cancer, we set out to understand the importance of verified cancer cell interactions, which are driven by surface exposed outer membrane adhesins. Our goal was to confirm the roles of FadA and Fap2 in HCT116 binding and signaling, as well as perform the first characterization of multiple Type 5c trimeric autotransporter adhesins which have a well-established role in the virulence potential of other gram-negative bacteria such as *Yersinia* (33, 34). We recently bioinformatically identified five Type 5c adhesins in the strain *F. nucleatum* 23726, with four of these (CbpF, FvcB, FvcC, FvcD) containing all of the classic domains that make up a complete adhesin. The fifth protein (FvcE, not characterized) lacks a ‘head’ domain that is predicted to coordinate adhesion (23). To study these proteins, we made the first complete, single gene knockouts of these six adhesin genes (*fadA*, *fap2*, *cbpF*, *fvcb*, *fvcc*, *fvcd*) in *F. nucleatum* 23726, as well as multiple gene deletions per strain (Table S1-3) using a new version of a galactose kinase (GalK) genetic system previously used in *F. nucleatum* (35), as well as many classical studies in *Clostridium* (36). The details of developing this efficient genetic system and gene deletions used in this study can be found in Figures S1-6 and the *Materials and Methods*.

We first established that the deletion of *galKT*, which remains in all of the subsequent mutant strains, did not affect growth (Fig. S3H) and binding to HCT116 cells (Fig. 1E) when compared to wild type (WT) *F. nucleatum* 23726. We have used the nomenclature *Fnn* to describe the *F. nucleatum* 23726  $\Delta galKT$  strain throughout the paper and figures (Fig. 1E).

We next show that *Fnn*  $\Delta fap2$  is significantly attenuated for HCT116 cellular interactions (Fig 1F), but that *Fnn*  $\Delta fadA$  shows no decrease in HCT116 interactions. While FadA has been shown to drive interactions with cancer cells, we note that these studies were done in the strain *F. nucleatum* 12230 (31, 37, 38). Upon bioinformatic analysis, we found that *F. nucleatum* 23726 contains four *fadA* ortholog genes (*fadA2*, *fadA3a*, *fadA3b*, *fadA3c*), and *F. nucleatum* 12230 encodes for only one orthologue (23). This could mean that a single deletion of the *fadA* gene in *F. nucleatum* 23726 remains adhesive, and that multiple *fadA* family proteins are contributing to binding and invasion. In addition, a *Fnn*  $\Delta fap2$  *fadA* double mutant did not further reduce binding when compared to *Fnn*  $\Delta fap2$  (Fig. 1F). Concurrently, we analyzed single mutants of the trimeric autotransporter adhesins *cbpF*, *fvcb*, *fvcc*, *fvcd*, as well as a strain lacking all four genes (*Fnn*  $\Delta cbpF$  *fvcbcd*). We show that FvcB, FvcC, and FvcD contribute to invasion, albeit less potently than Fap2. Importantly, a *Fnn*  $\Delta fap2$  *cbpF* *fvcbcd* quintuple mutant showed no significant decrease in HCT116 invasion when compared to the single *fap2* gene deletion strain. Last, we show that the proportion of intracellular *Fnn* and *Fnn*  $\Delta fap2$  determined by antibiotic protection assays (Fig. 1G) correlates with the flow cytometry data, indicating that the trypsinization used to prepare infected HCT116 cells likely removes the majority of surface bound bacteria. Taken together, these data indicate that host cell binding and invasion is largely driven by Fap2.

155

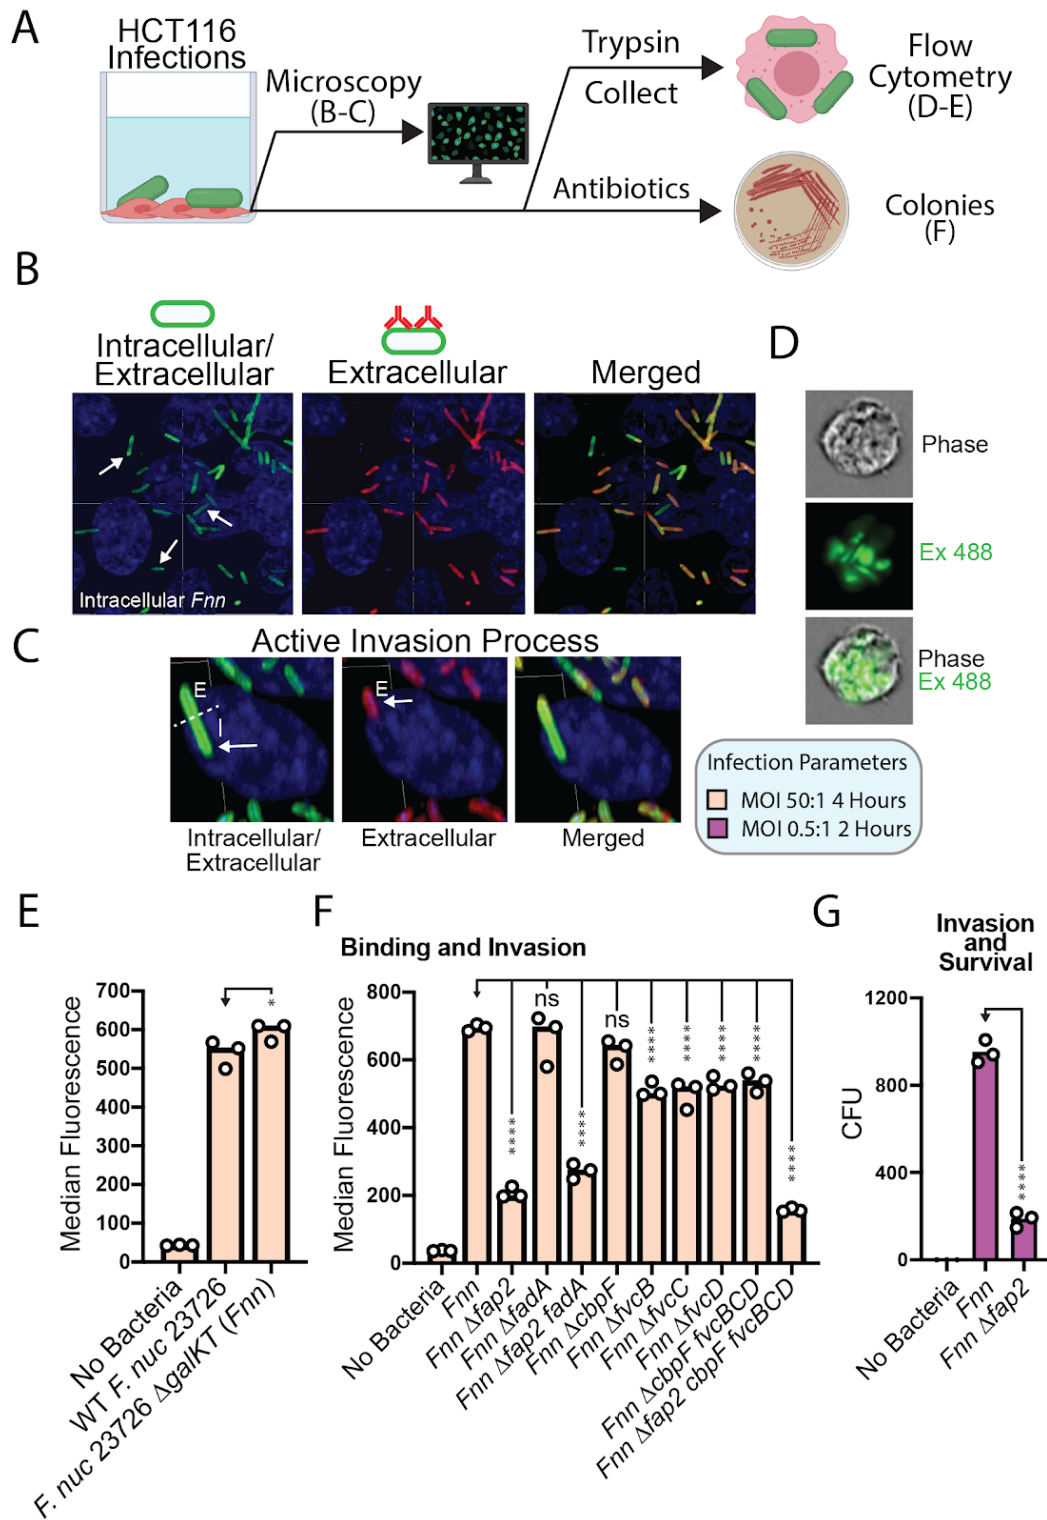

156

157

158

159

160

161

162

163

164

165

**Fig. 1. *F. nucleatum* binds to and invades HCT116 cells.** (A) Overview of experiments used to analyze binding and invasion of *Fnn* and adhesin mutants in HCT116 CRC cells. (B) Intra- and extracellular *Fnn* detected with a fluorescent lipid dye (Green, intra- and extracellular) and a pan-*Fusobacterium* membrane antisera (Red, extracellular), host cell nuclei are stained with DAPI (blue). (C) Zoomed in view and focus on a single *Fnn* bacterium that is half intracellular, half extracellular. (D) Imaging flow cytometry view of intracellular *Fnn*. (E) Comparison of HCT116 binding and invasion of wild type (WT) *F. nucleatum* 23726 with *F. nucleatum* 23726  $\Delta galKT$  (*Fnn*). (F) Binding and invasion analysis of *Fnn* and adhesin gene deletion strains using flow cytometry. (G) Invasion and survival of *Fnn* and *Fnn*  $\Delta fap2$  in HCT116 cells analyzed using an antibiotic protection assay.

166 ***F. nucleatum* host-cell binding and invasion is critical for inducing the secretion of pro-inflammatory**  
167 **and pro-metastatic cytokines from cancer cells**

168 After confirming the importance of outer membrane adhesins in invading HCT116 cells, we analyzed the ability  
169 of this bacterium to induce the secretion of cytokines from both human cancer cells and mouse neutrophils and  
170 macrophages. Using cytokine arrays (**Fig. 2A-C**), we report that *F. nucleatum* 23726 interactions with HCT116  
171 cells induces the secretion of high concentrations (~ 1000 pg/mL after four hours) of the CXC family cytokines  
172 IL-8 and CXCL1 into the culture medium (**Fig. 2D**). To determine if direct binding and invasion is necessary for  
173 induced cytokine secretion, as well as to rule out whether an unidentified secreted protein or molecule induces  
174 this phenomenon, we compared *Fnn* to *Fnn Δfap2*. Our results show that the ability of *Fnn Δfap2* to induce  
175 cytokine secretion from HCT116 cells is significantly attenuated. This correlates well with reduced invasive  
176 potential and confirms direct interaction is needed to alter host cells (**Fig. 2D**).

177 To test if this phenomenon was specific to strain *F. nucleatum* 23726, we compared IL-8 and CXCL1  
178 secretion levels to *F. nucleatum* 25586 and 7\_1, which cover subspecies *nucleatum* and *animalis* (*Fna*)  
179 respectively. We show that these strains also induce comparable, significant levels of cytokine secretion.  
180 Lastly, we compared our 4 hour secretion levels to that of the 24 hour level for *F. nucleatum* 23726 and report  
181 an increase in CXCL1 and IL-8 to ~ 7000 pg/mL and ~2500 pg/mL respectively.

182

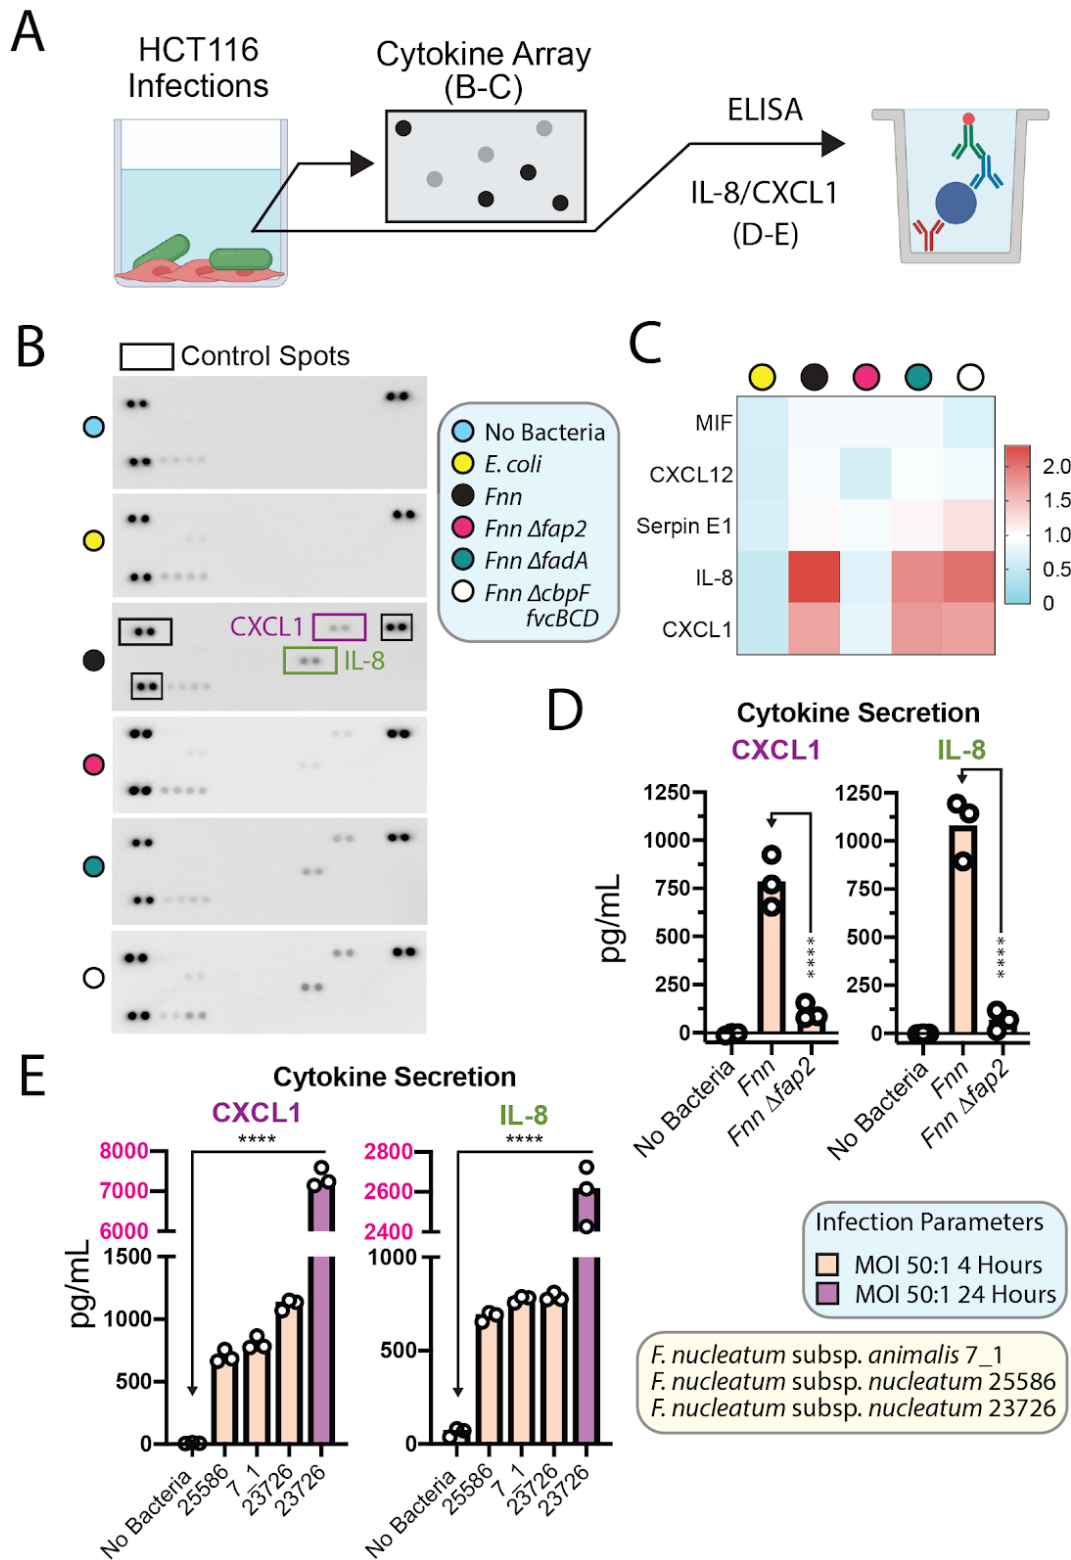

183

184

185

186

187

188

189

190

191

**Fig. 2. *F. nucleatum* induces cytokine secretion from HCT116 cells.** (A) Overview of experiments used to analyze *Fnn* induced cytokine secretion from HCT116 CRC cells. (B) Broad cytokine array dot blots analyzing *Fnn* and *Fnn* adhesin deletion strains. (C) Heatmap of fold increased dot blot intensity reveals an increase in IL-8 and CXCL1 secretion for invasive strains. (D) IL-8 and CXCL1 ELISA to quantitate cytokine secretion from HCT116 cells induced by *Fnn* and *Fnn Δfap2*. (E) IL-8 and CXCL1 ELISA to quantitate and compare cytokine secretion from HCT116 cells induced by *F. nucleatum* subsp. *nucleatum* 25586, *F. nucleatum* subsp. *nucleatum* 23726, *F. nucleatum* subsp. *animalis* 7\_1 (*Fna*).

### ***F. nucleatum* induced cytokine secretion in neutrophils and macrophages is not Fap2 dependent**

We characterized cytokine secretion from mouse immune cells using a mouse-specific cytokine array. We first concurrently tested neutrophil cytokine secretion (**Fig. 3B**), as well as validated the direct binding and potential invasion of neutrophils via fluorescence microscopy (**Fig. 3C**). *F. nucleatum* induces the secretion of CCL3, CXCL2, and TNF $\alpha$ , and we validate high amounts of CCL3 and CXCL2 from neutrophils via ELISA (**Fig. 3D**). In mouse macrophages, *F. nucleatum* also induces CCL3, CXCL2, and TNF $\alpha$  secretion (**Fig. 3E**), as well as CCL5 and additional cytokines when compared to either no bacteria or *E. coli* control infections. CCL3 has a defined role in lymphocyte recruitment in early metastatic CRC (39), and CXCL2 has been shown to promote angiogenesis in CRC tumor microenvironments (40). Interestingly, microscopy shows a smeared DNA pattern from infected neutrophils, potentially indicating the formation of neutrophil extracellular traps (NETs) and a pathway for cytokine secretion (41). *F. nucleatum* and other oral bacteria were previously shown to degrade NETs, which is a potential escape mechanism from neutrophil-mediated death (42). In stark contrast to the Fap2-driven cytokine secretion seen in HCT116 cancer cells, *Fnn*  $\Delta$ *fap2* did not show decreased levels of CCL3 or CXCL2 secretion as analyzed by cytokine arrays and ELISA. We conclude that this shows the importance of Fap2 in selective cancer cell binding, which is evidenced by a lack of Gal/GalNAc sugar on immune cells. In addition, we acknowledge that a role of immune cells is to engulf and clear invading organisms like bacteria, and therefore these cells have acquired the ability to recognize a broad range of bacterial ligands as endocytosis targets.

211

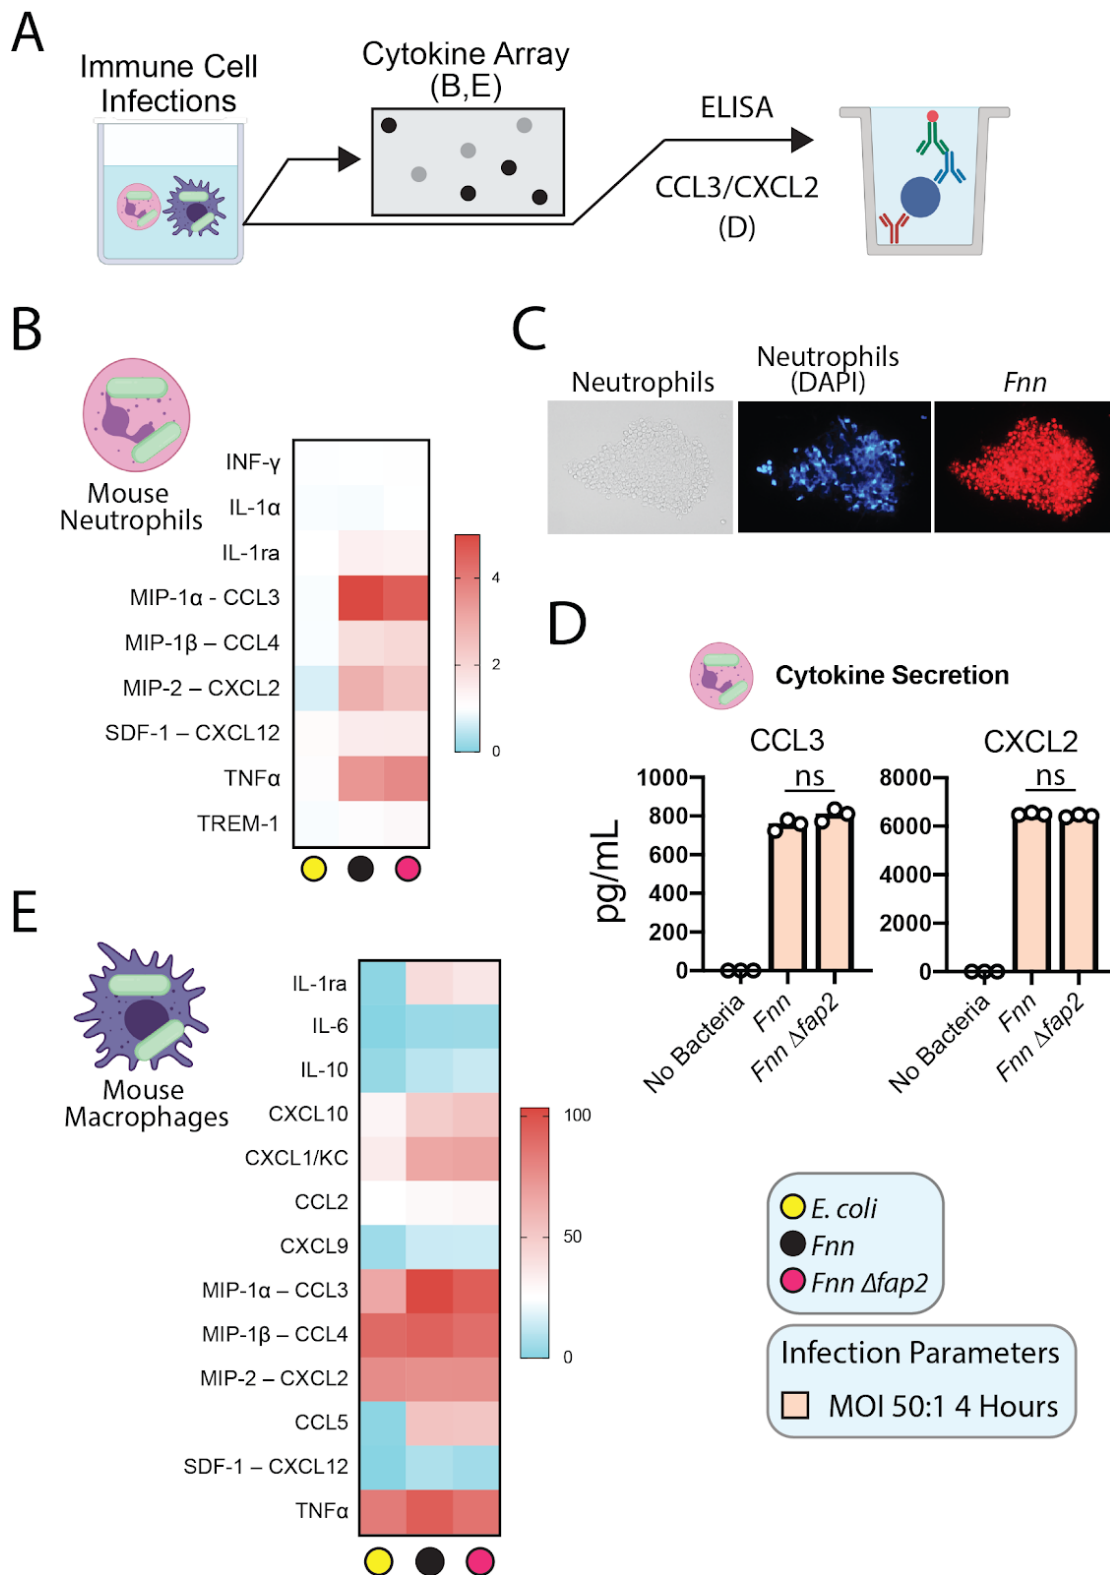

212

213

214

215

216

217

218

219

**Fig. 3. Cytokine secretion analysis from mouse neutrophils and macrophages.** (A) Overview of experiments used to analyze *Fnn* induced cytokine secretion from immune cells. (B) Mouse cytokine array shows *Fnn* induced secretion of CCL3, CXCL2, and TNF $\alpha$  from neutrophils. (D) Fluorescence microscopy of *Fnn* interacting with mouse neutrophils. (D) ELISA confirming *Fnn* induction of CCL3 and CXCL2, and revealing that deletion of *fap2* does not decrease cytokine secretion as it does in HCT116 cells. (E) Mouse cytokine array shows *Fnn* induced secretion of several cytokines from macrophages when compared to *E. coli* and no bacteria controls.



## Inhibition of bacterial invasion using sugars and arginine blocks cytokine secretion

Since Fap2 is a Gal/GalNAc sugar binding lectin, and this sugar is overrepresented on the surface of CRC cells, we next tested a panel of galactose and non-galactose containing sugars for their ability to inhibit HCT116 binding and IL-8 and CXCL1 secretion. We show that galactose, GalNAc, and lactose (galactose disaccharide) potently inhibit HCT116 binding and invasion, while control sugars including glucose and maltose do not significantly inhibit invasion (**Fig. 4A-B**). In addition, we tested L-arginine as an inhibitor because the *F. nucleatum* surface adhesin RadD, which is predominantly thought to coordinate interspecies bacterial interactions in the oral biofilm, is an L-arginine inhibitable adhesin (43–45). We show that L-arginine inhibits HCT116 cellular invasion, but not to the extent of galactose sugars. All sugar molecules tested and L-arginine lead to reduced IL-8 and CXCL1 secretion (**Fig. 4C**), with the most potent being GalNAc as seen in the binding and invasion assay. We believe the addition of 10 mM glucose and maltose results in non-specific inhibition of cytokine secretion, or could be binding to an unidentified *F. nucleatum* lectin.

Finally, we tested the autophagy and endosome maturation inhibitor chloroquine for its ability to inhibit invasion and signaling (**Fig. 4D**). This experiment was performed because the two previous studies reporting *F. nucleatum* induced metastasis showed chloroquine is able to inhibit cellular migration, and we set out to test if this is due to reduced cytokine levels (11, 12). We show that chloroquine does not inhibit bacterial invasion at 10  $\mu$ M, and slightly decreases invasion into HCT116 cells at 50  $\mu$ M. In addition, we saw the reverse effect of chloroquine on cytokine signaling, with a slight increase in secreted IL-8 and CXCL1. We elaborate on this finding in the *Discussion*.

239

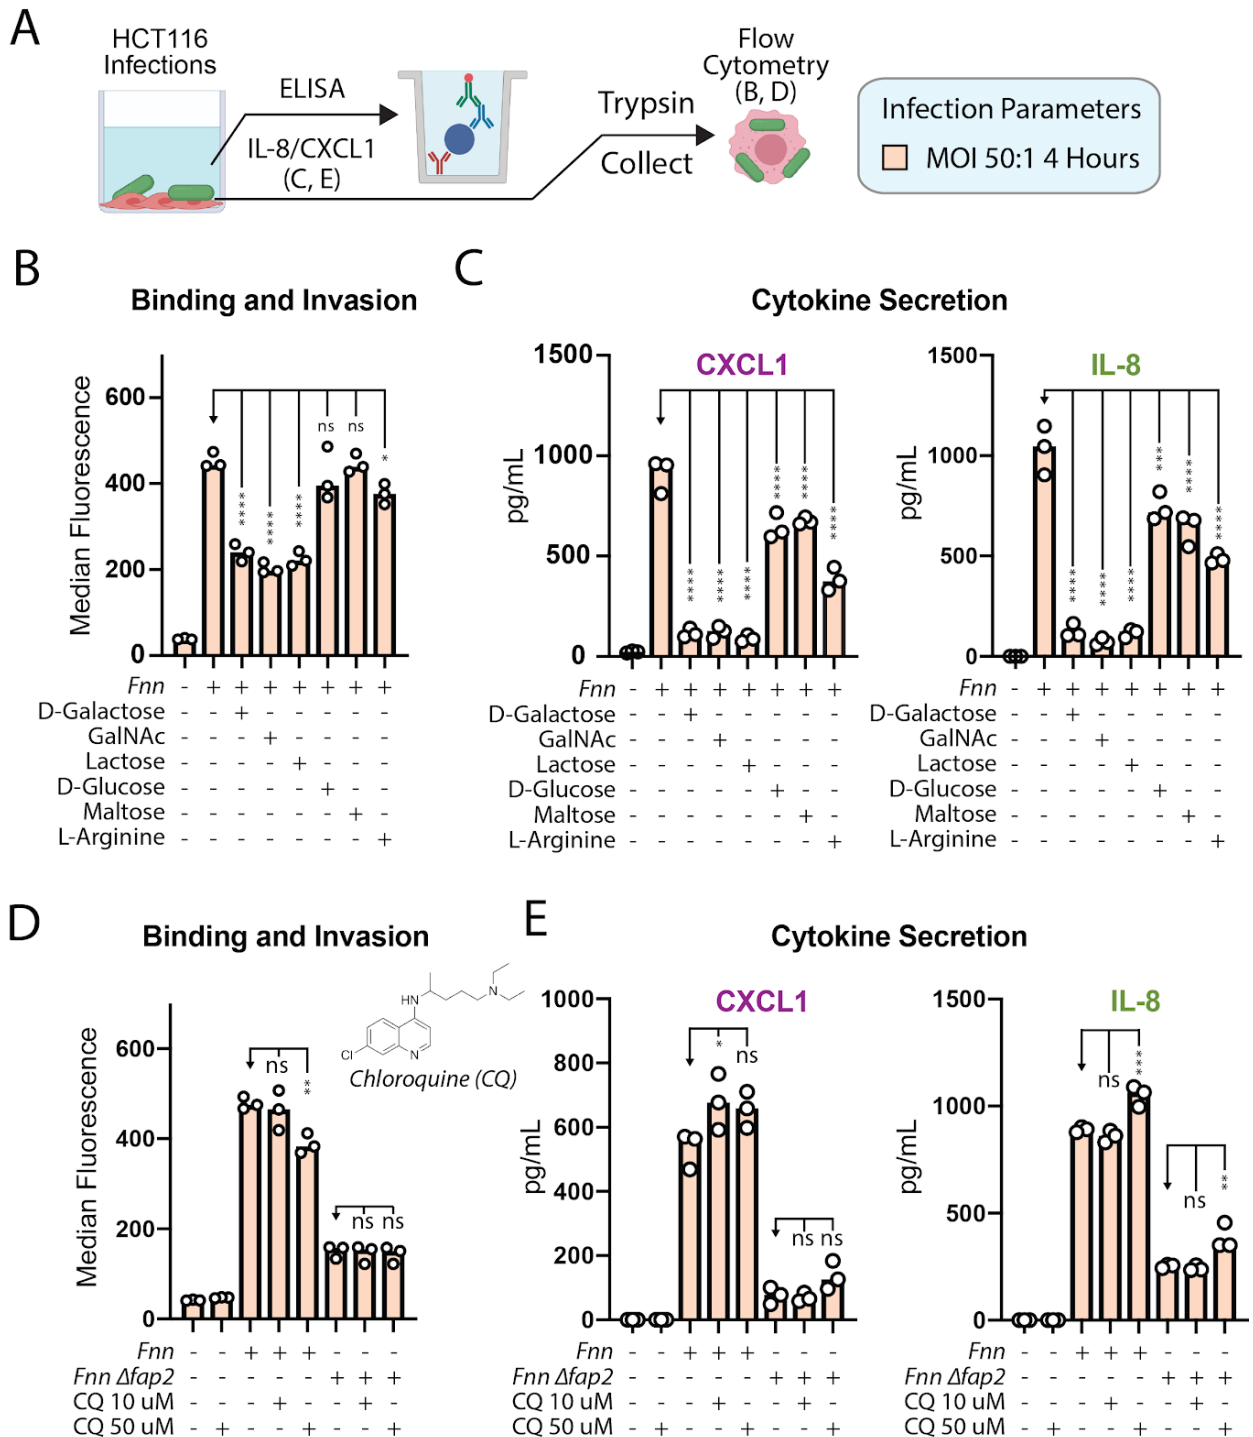

240

241

242

243

244

245

246

**Fig 4. Inhibition of *Fnn* HCT116 binding and invasion using small molecules.** (A) Overview of experiments used to analyze small molecule inhibitors of *Fnn* binding and invasion of HCT116 CRC cells. (B) *Fnn* invasion is significantly inhibited by galactose containing sugars and L-arginine (10 mM). (C) Secretion of IL-8 and CXCL1 from HCT116 cells is inhibited by all sugars tested and L-arginine (10 mM). (D) *Fnn* invasion is not inhibited by 10  $\mu$ M chloroquine (autophagy and endosome maturation inhibitor), and (E) to the contrary could increase CXCL1 and IL-8 secretion.

## 247 **IL-8 and CXCL1 induce HCT116 cellular migration**

248 Based on previous reports of IL-8 induced migration of CRC cells (46), endothelial cells, and leukocytes (47),  
249 as well as a role for CXCL1 induced metastasis in multiple cancers including colorectal (13, 18, 48), we tested  
250 their roles in HCT116 migration using transwell assays (Fig. 5A-C). We show that IL-8 and CXCL1 separately  
251 induce robust HCT116 migration at 100 ng/mL (Fig. 5D), but when added together at the same concentration  
252 do not additively increase migration.

## 253 ***F. nucleatum* conditioned supernatants from HCT116 infections cause cancer cell migration**

254 After showing that purified IL-8 and CXCL1 induce cancer cell migration, we tested if *F. nucleatum* conditioned  
255 culture media from HCT116 infections could cause non-infected cells to migrate. We show through transwell  
256 assays that *F. nucleatum* conditioned HCT116 culture media significantly induces non-*Fusobacterium* exposed  
257 cancer cells to migrate starting at 8 hours, with increasing significance through our 16 hour test (Fig. 5E). We  
258 subsequently demonstrate that infection with *Fnn*  $\Delta$ *fap2*, which leads to lower levels of IL-8 and CXCL1  
259 secretion, results in significantly reduced cell migration when compared to *Fnn* conditioned media (Fig. 5F).

260 We developed a pan-*Fusobacterium* membrane antisera (DJSVT\_MAS1) to potentially block HCT116  
261 cell migration. However, our results show only a marginal reduction in cellular migration. This could be due to  
262 insufficient antibody concentrations added to the assay, or since the anti-sera was developed with 11 strains of  
263 *Fusobacterium*, its specific inhibitory effects on *F. nucleatum* 23726 have been distributed across non-*Fnn*  
264 proteins. However, the pan-*Fusobacterium* membrane antisera was able to significantly decrease cancer cell  
265 binding (Fig. 5G) and cytokine secretion (Fig. 5H).

266 Finally, we show that bead-conjugated antibody depletion of IL-8 and CXCL1 from *F. nucleatum*  
267 conditioned culture media significantly reduces the amount of migrated cells (Fig. 6), confirming our results  
268 with purified cytokines and conditioned media that IL-8 and CXCL1 specifically drive HCT116 cellular  
269 migration. As the depletion of these cytokines does not completely abolish *Fnn* conditioned media induced cell  
270 migration, we hypothesize that *F. nucleatum* modulates multiple host proteins and pathways involved in cellular  
271 migration and metastasis. We elaborate on this in the Discussion.  
272

273

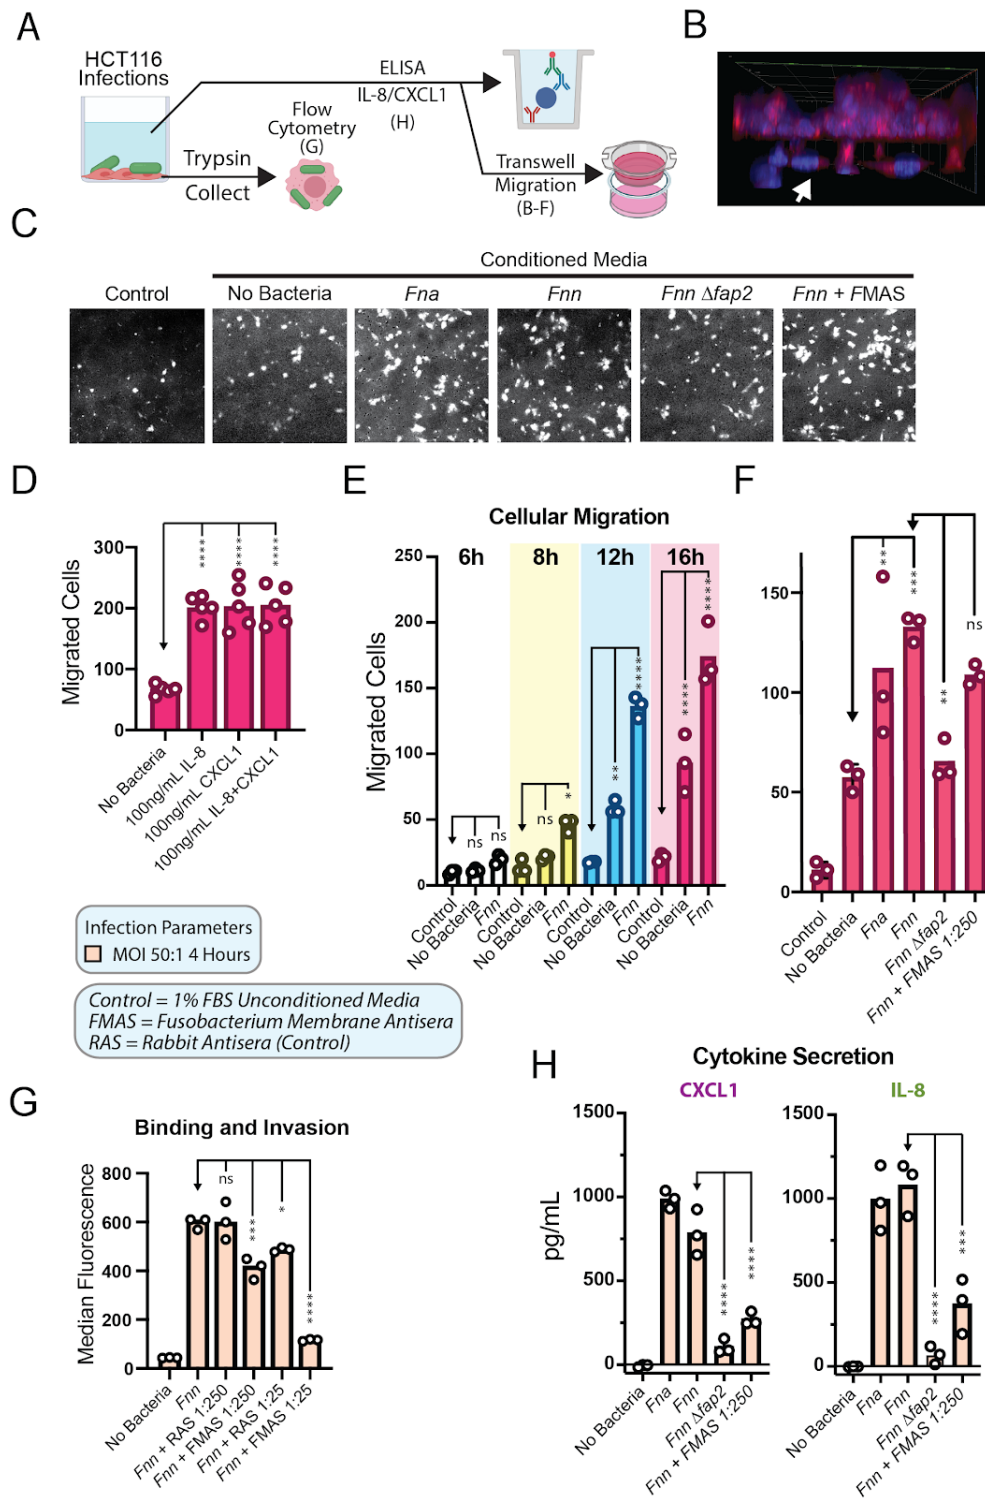

274

275

276

277

278

279

280

281

282

283

284

**Fig. 5. HCT116 migration is driven by *Fnn*-induced secretion of CXCL1 and IL-8.** (A) Experimental setup of HCT116 transwell migration experiments. (B) 3D confocal image of HCT cells (blue and red) migrated across the transwell barrier (white arrows). (C) Representative images of migrated HCT cells after exposure to the indicated conditioned media. (D) The addition of IL-8 and CXCL1 to culture media within the lower transwell chamber leads to significant HCT116 cancer cell migration. (E) HCT116 cellular migration induced by *Fnn* conditioned media with high CXCL1 and IL-8 concentrations. (F) Inhibition of HCT cellular migration through deletion of *fap2* (*Fnn*  $\Delta$ *fap2*) and *Fusobacterium* membrane antisera (FMAS). (G) Inhibition of HCT116 binding and invasion by *Fnn* using FMAS and control rabbit antisera (RAS). (H) Inhibition of CXCL1 and IL-8 secretion from HCT116 cells using FMAS.

285

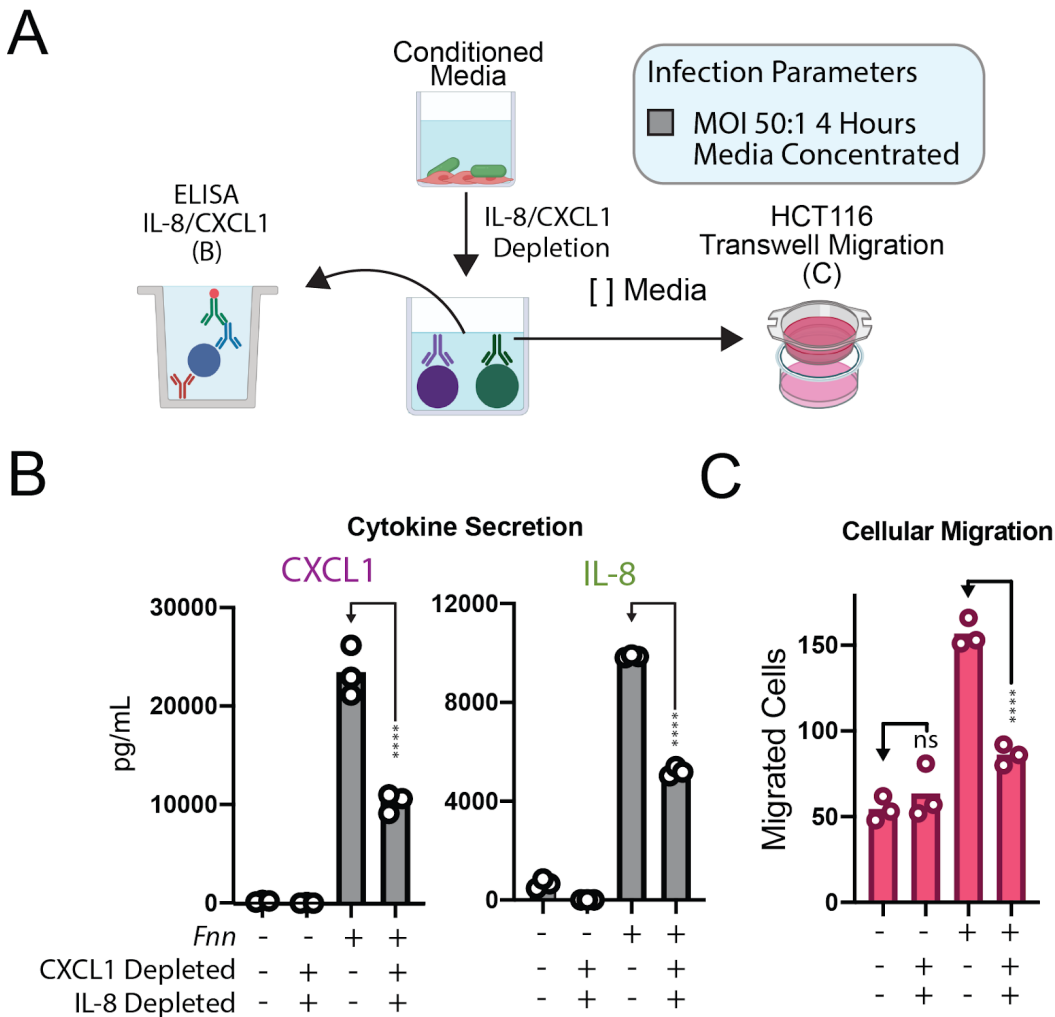

286

287

288

289

290

291

292

293

**Fig. 6. Depletion of CXCL1 and IL-8 from *Fnn* conditioned media block cancer cell migration.** (A) Experimental setup of HCT116 transwell migration experiments including cytokine depletion from conditioned media. (B) Analysis of CXCL1 and IL-8 levels after concentration, with and without antibody depletion of cytokines and before loading into the bottom chamber of the transwell. (C) Cellular migration is significantly decreased by depleting CXCL1 and IL-8, nearly to the level of non-*Fusobacterium* conditioned media even through cytokines were not completely depleted.

## DISCUSSION

Studies have illuminated a strong correlation between the presence of *Fusobacterium nucleatum* within colorectal tumors and deleterious patient prognosis, which is proposed to be causally related to increased tumor microenvironment inflammation, enhanced oncogenic signaling (49–52). To address the role of *F. nucleatum* in tumor microenvironment signaling, we set out to characterize potential signaling pathways that drive cellular migration and immune cell-driven cancer acceleration. Our data show that direct *F. nucleatum-cellular* interactions with cancer and immune cells, largely coordinated by the outer membrane adhesin Fap2, drive host cells to define a locally pro-metastatic, inflammatory microenvironment. The ability of this bacterium to cause selective induction of the proinflammatory and prometastatic cytokines IL-8 and CXCL1 from CRC cells complements prior studies in which these gross phenotypes of oncogenic acceleration from human patients and mouse models are consistently reported (10, 53, 54). In addition, our findings add to a growing understanding that *F. nucleatum* directly induces metastasis through cytokine release, increased NF- $\kappa$ B expression and subsequent expression of KRT7 (11), increased CARD3, and downregulation of E-cadherin (12). These studies have now shown active roles for *F. nucleatum* in mouse models of metastasis, which complement the seminal study by Bullman et al. first reporting viable *F. nucleatum* within human CRC cell metastases in the liver (Fig. 7) (10).

CXCL1 and IL-8 both play roles in immune cell recruitment, particularly neutrophil recruitment and programming. Through paracrine signaling, *F. nucleatum* interactions with CRC cells could be releasing factors that create not only a metastatic environment, but one that provides pro-tumor inflammation. There is the potential for recruited neutrophils to be activated to tumor-associated neutrophils (TAN) that could further accelerate tumor progression. In addition, if *F. nucleatum* or the tumor microenvironment then induces neutrophil extracellular trap (NET) formation, these structures have been shown to increase metastasis and sequester circulating tumor cells to promote reseeding (55–57). Finally, it was shown that high intra-tumor loads of *F. nucleatum* resulted lower CD3+ T-cell density in CRC, providing another layer to the complexity of *F. nucleatum* immune cell regulation (58). To address these potential scenarios, a priority should be placed on investigating the potential for this bacterium to induce the formation of additional pro-oncogenic cell types including cancer-associated fibroblasts (CAF) (59), tumor-associated macrophages (TAM) (60), and tumor-associated neutrophils (TAN) (55).

Bacteria such as *Streptococcus gallolyticus* are known to induce the secretion of IL-8 in colon tumor cells (61). It has also been shown that increased expression of IL-8 leads to a significant resistance to the cytotoxic effects of oxaliplatin, a platinum based chemotherapeutic drug (46). As *F. nucleatum* was previously shown to induce chemoresistance through the induction of autophagy and subsequent inhibition of apoptosis (51), our report of the induction of IL-8 and CXCL1 by this bacterium adds another dimension to this story.

Our data definitively shows the importance of *F. nucleatum* binding and invasion of human cancer cells in producing pro-metastatic cytokines. We and others have proposed that the development of small molecule compounds or proteins that are able to block *F. nucleatum* docking to host cells could be effective strategies to reduce cancer and immune cell signaling that accelerates metastasis from the colon. A starting point could be the selective inhibition of Fap2, which we have now shown drives binding and cytokine secretion. Fap2 was previously characterized as a lectin and shown to bind to Gal/GalNac sugars that are in abundance on the surface of most cancer cells, especially colorectal (62). The potential for targeting of bacterial lectins for disease treatment has been validated in urinary tract infections by using mannoside sugar derivative compounds that block the uropathogenic *E. coli* lectin FimH from binding to host receptors, thereby resulting in depletion of this pathogenic bacteria from the gut (63).

Two recent studies report that chloroquine blocks metastasis by lowering *F. nucleatum*-induced NF- $\kappa$ B driven expression of Keratin 7; a protein linked to increased cancer cell motility and invasive potential (64, 65), and overexpression of CARD3; a pro-metastatic kinase previously characterized in breast cancer (66). We were therefore interested in whether the IL-8 and CXCL1-regulated cell migration we have observed might be mitigated by chloroquine administration. Our results show that chloroquine treatment actually increased the secretion of IL-8 and CXCL1, suggesting that multiple pathways may be at play in regulating *F. nucleatum*-driven metastasis. This outcome is also the opposite of the effect chloroquine has on reducing the amount of IL-8 secreted upon *Campylobacter jejuni* infections (67). Taken together these observations could mean the IL-8 and CXCL1 secretion we observed is not caused by a Toll-Like Receptor (TLR) maturation

347 dependent mechanism, for which chloroquine has been shown to regulate (67, 68), but is still NF- $\kappa$ B  
348 dependent. In addition, inhibiting autophagy could lead to increased intracellular survival of *F. nucleatum*. This  
349 should be characterized further before these inhibitors are considered for use as more than chemical tools to  
350 understand host biological pathways.

351 As a final point, since the consensus belief is that *F. nucleatum* leaves the oral cavity and traverses the  
352 human body through the blood and potentially lymph, it could be advantageous to use a vaccine-based  
353 strategy whereby antibodies block and clear this bacterium prior to leaving the bloodstream, thereby preventing  
354 downstream tumor interactions. Our data using a pan-*Fusobacterium* membrane antisera show effective  
355 blocking of *F. nucleatum* entry into cancer cells, but this strategy needs refinement to increase strain specific  
356 potency. Hence, interfering with *F. nucleatum* interactions in the human body could be a targeted approach that  
357 provides an alternative to using non-specific antibiotics. Finally, we hypothesize that future studies  
358 characterizing how *F. nucleatum* intricately influences multiple cell signaling pathways during cancer  
359 progression and metastasis will lead to targeted approaches for controlling additional oncomicrobes in cancer.

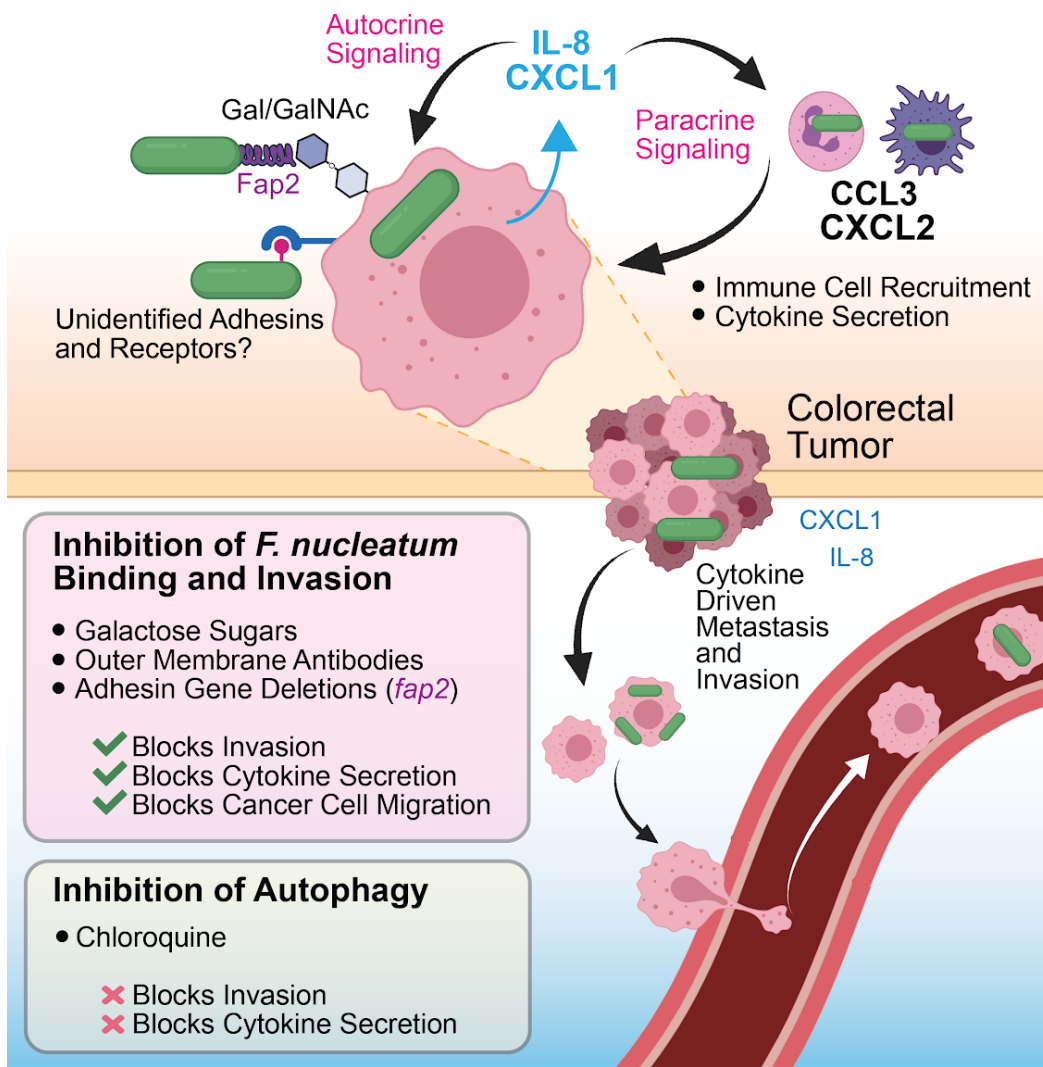

**Fig. 7. A model of *F. nucleatum* induced metastasis through cytokine signaling.** We show that *F. nucleatum* induces IL-8 and CXCL1 secretion from CRC cells, and both cytokines have been characterized as key players in cancer metastasis and subsequent downstream cell seeding. As well as autocrine signaling back to cancer cells as a metastatic signal, HCT116 derived cytokines can participate in paracrine signaling to recruit neighboring immune cells, which further secrete their own cytokine signatures that alter the tumor microenvironment through metastatic, inflammatory, and immune cell programming.

## MATERIALS AND METHODS

### Culturing *Fusobacterium nucleatum*

*Fusobacterium nucleatum* subsp. *nucleatum* ATCC 23726, *Fusobacterium nucleatum* subsp. *nucleatum* ATCC 25586, and *Fusobacterium nucleatum* subsp. *animalis* 7\_1 (*Fna*) were cultured on solid agar plates made with Columbia Broth (Gibco) substituted with hemin (5 µg/mL) and menadione (0.5 µg/mL) (CBHK) under anaerobic conditions (90% N<sub>2</sub>, 5% H<sub>2</sub>, 5% CO<sub>2</sub>) at 37 °C. Liquid cultures started from single colonies were grown in CBHK media under the same conditions. For infections, overnight cultures were back diluted 1:1000 and grown to mid-exponential phase (~0.5 OD<sub>600</sub>) prior to subsequent experiments unless otherwise noted.

### Culturing HCT116 CRC cells

HCT116 (ATCC CCL-247) cells were purchased from ATCC and grown on tissue culture treated plates and flasks in McCoy's 5A media supplemented with 10% fetal bovine serum (FBS), penicillin, and streptomycin. Cells were grown to no more than passage 15 at 37 °C with 5% CO<sub>2</sub>. For maintenance between infections, cells were passaged by gentle trypsinization and reseeded. For infection experiments, cells were grown to >90% confluency in 6 or 24 well plates. Unless otherwise indicated, all experiments were conducted with HCT116 media supplemented with 10% FBS.

### Molecular cloning of a galactose selectable gene deletion system.

We have developed a new iteration of a galactose-selectable gene deletion system in *Fusobacterium nucleatum* ATCC 23726 (*Fnn*) capable of deleting an unlimited number of genes in a single strain. We showcase the power of our genetic system by developing strains containing multiple gene deletions from ~300bp-12kb, as well as chromosomally complementing tagged versions of these virulence factors for detection and purification. The plasmids used for these genetic mutations are all new, developed in house, and represented in **Table S2**. This system is different than a previously reported system in that it relies on the deletion of both the galactose kinase (*galK*) and galactose-1-phosphate uridylyltransferase (*galT*) in the Leloir pathway (**Fig. S1**); ultimately creating a system that allows for the selection of target gene deletions on solid media containing galactose and not the more expensive 2-Deoxy-D-galactose. The first step in creating the chloramphenicol and thiamphenicol selectable plasmid pDJSVT1 was to PCR amplify the *catP* gene from a pJIR750 backbone (*Clostridium* shuttle vector) followed by using overlap extension PCR (OLE-PCR) to fuse a pMB1 *E. coli* origin of replication from pUC19 (**Fig. S2A**)(See **Table S1** for primers). This linear product, which contains a multiple cloning site with GC rich DNA restriction sites (*Xho*I, *Not*I, *Kpn*I, and *Mlu*I) that are optimized for cloning in DNA from AT rich bacteria such as *Fusobacterium* (~75% AT), was cut with *Not*I and ligated to circularize the plasmid. This final high copy pDJSVT1 construct is small (~1800 bp), which likely enhances transformation efficiency.

pDJSVT1 is the base vector to create multiple additional vectors to complete the genetic system. To delete the *galK* and *galT* genes in *F. nucleatum* 23726 to make the base strain DJSVT02 (**Fig. S3A**), 1000 bp directly up and downstream of the *galKT* gene cluster were amplified separately, then fused using OLE-PCR. This 2kb PCR product was then digested with *Kpn*I/*Mlu*I and ligated into pDJSVT1 digested with the same enzymes. This final vector is pDJSVT13. This vector was electroporated (1-3 µg DNA, 2.5 kV, 50 µF capacitance, 360 OHMS resistance) into competent *F. nucleatum* 23726 and selection on chloramphenicol (single chromosomal crossover), followed by selection on solid media containing 1% 2-Deoxy-D-galactose to select for either *galKT* gene deletions, as the absence of the *galT* gene makes 2-Deoxy-D-galactose non-toxic to *F. nucleatum* (**Fig. S1**).

The next plasmid is for targeted gene deletion in the *F. nucleatum* 23726 Δ*galKT* (*Fnn*: strain DJSVT02) background. This vector, pDJSVT7 (**Fig. S2B**), contains a FLAG::*galK* gene under the control of a *Fusobacterium necrophorum* promoter. Transformation allows for initial chromosomal integration and selection with thiamphenicol, followed by selection for double crossover gene deletions on solid media containing 3% galactose. For this study, this vector was used to create gene deletions in *fap2*, *fadA*, *cbpF*, *fvbB*, *fvbC*, and *fvbD* in *F. nucleatum* 23726 Δ*galKT*. As shown in Figure S4, 750 bp directly up and downstream of a target gene for intra-bacteria homologous recombination were amplified by PCR, making complementary fragments fused by OLE-PCR. This product (Fig S4A) is ligated into pDJSVT7 using *Kpn*I/*Mlu*I restriction sites. This vector is then electroporated (2.5 kV, 50 µF capacitance, 360 OHMS resistance) into competent *F. nucleatum*



23726  $\Delta$ galKT and selected on chloramphenicol (single chromosomal crossover), followed by selection on solid media containing 3% galactose which produces either complete gene deletions or wild-type bacteria revertants. Gene deletions are verified by PCR and sequencing, and we show this system has been accurate down to the single base level (Fig. S5). For creating multiple gene deletions in a single strain (Table S3), additional vectors are created and mutants made in sequential fashion, as gene deletion leaves no trace of vectors, including excision of the chloramphenicol and galactose selection genes.

The third vector in the suite, pDJSVT11 (Fig. S2C)(not used in this study), is to create single copy chromosomal complementations at a static chromosomal location within the *arsB* gene, which is only necessary during times of high arsenic exposure and therefore doesn't change the phenotype of *Fnn* under any conditions tested (Fig. 1E, Fig. S3H).

### RNA Extraction and RT-PCR

*F. nucleatum* cultures were grown to stationary phase and pelleted by high-speed centrifugation (12,000 g for 2 min at room temperature). TRIzol Extraction Isolation of total RNA was performed following manufacturer's instructions (Invitrogen). Briefly, cell pellets were resuspended in 1 mL of TRIzol reagent (Invitrogen) and 0.2 mL of chloroform was added. Solution was centrifuged for 15 minutes at 12,000 g at 4 °C. The RNA-containing aqueous phase was collected and the RNA precipitated after 500  $\mu$ L of isopropanol had been added. The RNA pellet was then washed with 75% ethanol and centrifuged at 10,000 g for 5 minutes at 4°C. After drying at room temperature for 10 min, the RNA pellet was resuspended in 30  $\mu$ L sterile RNase-free water, and solubilized by incubating in water bath at 55 °C for 10 minutes. Total RNA was quantified using Qubit™ RNA HS Assay Kit (ThermoFisher).

Before reverse transcriptase (RT)-PCR, RNA samples were subjected to DNase treatment. Briefly, 500 ng of total RNA was incubated with DNase I (Invitrogen) for 2 hours at 37 °C. Following treatment, DNase I was inactivated using EDTA and heating mixture for 5 minutes at 65 °C. (RT)-PCR was performed using the Takara PrimeScript™ One Step RT-PCR Kit according to the manufacturer's instructions. The PCR conditions consisted of reverse transcription for 30 min at 50°C, initial denaturation for 2 min at 94 °C, followed by 30 cycles (30 sec at 94°C, 30 sec at 50-62°C, and 30 sec at 68°C) and elongation at 68 °C for 1 min. The expected bands around 250 bp was confirmed on a 1.5% agarose gel. Specific primers to detect knockout of gene and validate intact genes upstream and downstream of gene of interest (Supplementary Table 1) were used to amplify from RNA extracts.

### Development of a pan-*Fusobacterium* outer membrane antisera

To test if broadly-neutralizing polyclonal antisera against *Fusobacterium* outer membrane proteins could be effective at blocking cellular binding and entry, rabbits were injected (New England Peptide) with purified total membrane proteins from 11 strains of *Fusobacterium* that span 7 species (*F. nucleatum* subsp. *nucleatum* 23726, *F. nucleatum* subsp. *animalis* 7\_1, *F. nucleatum* subsp. *polymorphum* 10953, *F. nucleatum* subsp. *vincentii* 49256, *F. periodonticum* 2\_1\_31, *F. varium* 27725, *F. ulcerans* 49185, *F. mortiferum* 9817, *F. gonidiaformans* 25563, *F. necrophorum* subsp. *necrophorum* 25286, *F. necrophorum* subsp. *funduliforme* 1\_1\_36S). 20 mL of each strain was grown as previously described to stationary phase before pooling. 220 mL of pooled *Fusobacterium* culture was centrifuged and the pellet resuspended in 40 mL of phosphate-buffered saline pH 7.4 (PBS) with 2 roche EDTA free protease inhibitor tablets, frozen at -80 °C, and passed through an Emulsiflux C3 at >15k PSI to lyse cells. Lysate was centrifuged at 18000g for 25 minutes to pellet debris and unlysed cells. The supernatant was carefully transferred to ultracentrifuge tubes, and centrifuged in a 50-Ti rotor at 38,000 rpm (~144kG average) for 1 hr and 40 min. The supernatant was discarded, the membrane protein pellet was gently washed with PBS, and 0.5 mL of PBS with 1% BOG was added to each of the two tubes and gently resuspended by stirring overnight at 4 °C. The protein concentration was determined by BCA prior to shipment to New England Peptide for inoculation into rabbits. The resulting membrane antisera is herein named DJSVT\_MAS1, but for clarity is described in Figure legends as FMAS for *Fusobacterium* membrane antisera.

### Immunofluorescence sample preparation using pan-*Fusobacterium* membrane antisera

475 Confluent HCT116 cells on slides were infected with FM -143FX labeled (Green fluorescent lipid) *F. nucleatum*  
476 23726 in wells containing McCoy's 5A media with 10% FBS and no antibiotics at MOI of 50:1 for four hours at  
477 37 °C with 5% CO<sub>2</sub>. Post infection, media was removed and thoroughly washed with PBS with gentle orbital  
478 shaking. Infected cells were then fixed with PBS/3.2% paraformaldehyde for 20 minutes at room temperature,  
479 followed by washing with PBS. Cells were blocked with Sea Block (Abcam) for 2 hours at 37 °C, followed by  
480 the addition of 1:100 dilution of DJSVT\_MAS1 overnight at 4 °C. Slides were washed in PBS and incubated for  
481 1 hour with Alexa Fluor 594 goat anti-rabbit antibody diluted in Sea Block. After washing with PBS, cells were  
482 permeabilized with PBS/1% Triton X-100 for 20 minutes. Post-permeabilization, cells were washed in PBS and  
483 labeled with DAPI for 30 minutes. Following three final PBS washes, coverslips were mounted with 80%  
484 glycerol/0.1M Tris pH 8.5 and sealed onto glass slides. Fluorescence microscopy was performed on a Zeiss  
485 LSM 800 confocal microscope.

### 486 **Flow cytometry**

487 Mid-log phase *F. nucleatum* were incubated with 5 ug/mL FM 1-43FX Lipophilic Styryl Dye to stain outer  
488 membranes and allow for green fluorescence detection. After washing in PBS, bacteria were resuspended in  
489 PBS at 100x concentration (MOI 50:1) before adding to cultures of HCT116 in media containing 10% FBS.  
490 Infections lasted four hours prior to removing the culture media (in many cases used for ELISAs as described),  
491 cells washed twice with PBS, followed by cell recovery using 0.05% trypsin. After neutralizing trypsin with  
492 media containing 10% FBS, cells were pelleted and resuspended in PBS containing 20 mM EDTA. Cells were  
493 loaded onto a Guava easyCyte 5 flow cytometer (Luminex) and 10,000 cells were collected using an initial  
494 single cell gate to measure the median green fluorescence induced by intracellular *F. nucleatum* labeled with  
495 FM 1-43FX. Post data acquisition, FlowJo 10 software was used to further refine gating to single cells as well  
496 as determine median fluorescence of all samples. FlowJo analysis was then transferred to GraphPad Prism for  
497 statistical analysis and figure generation. In **Figure 1D** we show intracellular *F. nucleatum* 23726 using imaging  
498 flow cytometry on an Amnis ImageStream X Mk II. For this experiment, the same protocol for bacterial and  
499 HCT116 growth, FM 1-43FX labeling, and infection times were used.

### 500 **Invasion and survival antibiotic protection assays**

501 HCT116 monolayers were washed one time with PBS and the cells were incubated in media containing 10%  
502 FBS and no antibiotics. HCT116 cells were then infected at an MOI of 0.5:1 with exponential phase *F.*  
503 *nucleatum* for 2 hrs at 37 °C with 5% CO<sub>2</sub>. After infecting cells for 2 hrs, the cell culture media was aspirated-off  
504 and cells were washed 2 times with antibiotic-containing cell culture media to remove any unbound bacteria.  
505 Cells were then incubated in media containing penicillin and streptomycin (readily kills *F. nucleatum* 23726) for  
506 1 hr to kill any remaining extracellular bacteria. At the end of the incubation period, cells were washed twice  
507 with PBS. Epithelial cells were then incubated with warm sterile water to lyse HCT116 cells. Lysates were  
508 plated on CBHK plates and incubated at 37 °C under anaerobic conditions for 48 hrs followed by colony  
509 counting.

### 510 **Inhibition of *F. nucleatum*:HCT116 binding and signaling using chemical compounds and antibodies**

511 *F. nucleatum* invasion and induced host cell signaling inhibition by chemical compounds and neutralizing  
512 antibodies was analyzed using the standard infection conditions described above. Just prior to adding bacteria,  
513 with no pre-incubation time, 10 mM of D-galactose, GalNAc, lactose, D-glucose, maltose, or L-arginine were  
514 added to the culture media. For DJSVT\_MAS1 *Fusobacterium* membrane antisera, sera was added from  
515 between 1:25 to 1:250 dilutions per infection. Chloroquine was added to HCT116 cells at 10 µM for four hours  
516 prior to infection, and remained in the culture media during infections. For all compounds, after a four hour  
517 infection at MOI 50:1, binding and invasion was analyzed using flow cytometry.

### 518 **Isolation of mouse neutrophils and macrophages**

519 Mouse bone marrow neutrophils were isolated from wild type C57BL/6 mice over a 62.5% percoll gradient with  
520 centrifugation at 1100g for 30 min. Purity was >90% as determined by flow cytometry analysis with  
521 Ly6G+CD11b+ staining. Neutrophils were used immediately after isolation. For mouse bone marrow derived  
522 macrophages, bone marrow cells were cultured for 5 days in RPMI 1640 medium supplemented with 10%  
523 FBS, 2mM L-glutamine, 1% penicillin/streptomycin, and 10ng/mL M-CSF. Fresh medium was replaced every  
524

528 other day. Wild type C57BL/6 mice were bred and maintained in the animal facility at Virginia Tech in  
529 accordance with the Institutional Animal Care and Use Committee (IACUC)-approved protocol.

### 530 **Human/Mouse Inflammatory Cytokine Arrays**

531 Exponential phase *F. nucleatum* 23726 or *F. nucleatum* 23726  $\Delta$ *fap2* were used to infect HCT116 cell  
532 monolayers (100% confluency  $1.2 \times 10^6$  cells/well for 6 well plate) in antibiotic free cell culture media for four  
533 hours at a multiplicity of infection of 50 bacteria per human cell (MOI: 50:1). For neutrophils and macrophages,  
534  $1 \times 10^6$  cells in suspension were used. After four hours all media (1.5 mL) was collected and sterile filtered  
535 through 0.2  $\mu$ m filters (Millipore Sigma) to remove bacterial and human cells from the sample. The  
536 cytokine array membranes (R&D: Proteome Profiler Human Cytokine Array (ARY005B), Proteome Profiler  
537 Mouse Cytokine Array Kit, Panel A (ARY006)) were then blocked for one hour in TBS 3% bovine serum  
538 albumin (BSA) at room temperature on a rocking platform. While the membrane was blocking, 1.5 mL of each  
539 sample of collected infection media was incubated with 15  $\mu$ L of the human cytokine array detection antibody  
540 cocktail at room temperature for 1 hr. After 1 hr, the blocking buffer was poured off and the sample/antibody  
541 mixture was incubated with the array membrane at 4 °C overnight. Following incubation with the  
542 sample/antibody mixture, the array membrane was washed 3 times with PBS. A streptavidin-HRP conjugate  
543 was then added to the membrane and incubated for 30 min on a rocking platform. The array membrane was  
544 then washed 3 times with wash buffer to remove any unbound streptavidin-HRP. After the membrane was  
545 sufficiently washed it was incubated with a chemiluminescent substrate solution and results were analyzed  
546 using the G:Box gel imaging platform.  
547

### 548 **ELISA**

549 HCT116 cells were seeded to confluence in 24-well plates ( $2 \times 10^5$  cells/well at 100% confluence) and *F.*  
550 *nucleatum* was added to 500  $\mu$ L of these wells at a MOI of 50:1. The plates were then incubated at 37 °C, 5%  
551 CO<sub>2</sub> for four hours. The media was then collected from the wells, sterile filtered using a 0.2  $\mu$ m filter (Millipore  
552 Sigma) and diluted to concentrations within the range of the R&D Systems DuoKit ELISA to analyze human  
553 IL-8 and CXCL1 concentrations. For ELISAs detecting mouse CCL3 and CXCL2,  $1 \times 10^6$  fresh neutrophils in  
554 suspension were used as described for the HCT116 protocol.  
555

### 556 **Transwell HCT116 migration assays**

557 Transwell HCT116 migration assays were performed with Corning 8  $\mu$ m Transwell inserts in 24-well plates.  
558 HCT116 cells were first cultured in McCoy's 5A (ATCC) to 90% confluence, followed by collection with trypsin  
559 Cells were then stained using CellTrackerRed (ThermoFisher) and resuspended at a concentration of  $2 \times 10^6$   
560 cells/mL in media supplemented with 1% FBS. 100  $\mu$ L ( $2 \times 10^5$  cells) of the cell suspension was added to the  
561 top chamber of the 8  $\mu$ m Transwell insert pre-coated with 100  $\mu$ L Matrigel (Corning) (250  $\mu$ g/mL). The lower  
562 chamber contained 600  $\mu$ L of media with 1% FBS in addition to adding the following: 1) chemokines; purified  
563 recombinant human IL-8 (ThermoFisher Scientific) and CXCL1 (Sigma-Aldrich), individually or together at a  
564 concentration of 100 ng/mL; 2) conditioned and concentrated media obtained from four hour *F. nucleatum*  
565 infections of HCT116 cells. To prepare concentrated media for each sample, three T-75 flasks with confluent  
566 HCT116 cells were used. Before infection, the complete media in each flask was replaced with 10mL  
567 serum-free and PenStrep-free media. The bacteria resuspended in serum-free media were added at 50:1 MOI,  
568 and the flasks were incubated in a hypoxic chamber (1% O<sub>2</sub>) for four hours. The media containing the cell  
569 secretions was collected and pooled from three flasks, spun down at 3000xG for five minutes and passed  
570 through a 0.22 $\mu$ m filter. The samples were then concentrated from 30 mL to 1.5 mL using a 3000 MWCO  
571 Amplico concentrator (Millipore Sigma) at 4 °C. The resulting sample was used for ELISA and Transwell  
572 migration assays. The Transwells were incubated at 37 °C, 5% CO<sub>2</sub> for 6-16 hours, after which the cells on the  
573 top were removed using a cotton-tipped applicator and migrated cells at the bottom of the membrane were  
574 stained with DAPI and imaged on a Zeiss LSM 800 confocal microscope using a 10X objective. ImageJ was  
575 used to count the number of cells in 5 representative images per Transwell in biological triplicate (69).  
576  
577

### 578 **Depletion of IL-8 and CXCL1 from conditioned media**

579 Conditioned and concentrated media was obtained as described. Human IL-8/CXCL8 biotinylated antibody  
580 (R&D Systems BAF208) and Human/Primate CXCL1/GRO $\alpha$ /KC/CINC-1 biotinylated antibody (R&D Systems

BAF275) were added to the media to a final concentration of 40 ng/mL and incubated at room temperature with gentle shaking for 30 minutes. 150  $\mu$ L of magnetic streptavidin particles (Sigma-Aldrich 11641778001) were first washed twice with PBS and spun down at 1500 xG and added to the solution. The mixture was incubated at room temperature with gentle shaking for another 30 minutes. The samples were then spun down at 1500 xG, and the supernatant was collected containing the conditioned media with reduced cytokines. An ELISA quantified and confirmed the depletion. This media was subsequently used in transwell migration assays as described.

## Statistical analysis

All statistical analysis was performed in GraphPad Prism Version 8.2.1. For single analysis, an unpaired Student's *t* test was used. For grouped analyses, Two-way ANOVA was used. In each case, the following *P* values correspond to star symbols in figures: <sup>ns</sup>*P* > 0.05, \**P* < 0.05, \*\**P* < 0.01, \*\*\**P* < 0.001, \*\*\*\**P* < 0.0001. To obtain statistics, all studies were performed as three independent biological experiments.

## Acknowledgements

**Funding.** This research was supported by the National Institutes of Health through an NCI R21 Award (grant no. 1R21CA238630-01A1; Slade, Verbridge), an NIAID R01 Award (grant no. 5R01AI136386-03; Li), a National Science Foundation Career Award (grant no. CBET-1652112; Verbridge), The Fralin Life Science Institute at Virginia Tech (Slade), and the USDA National Institute of Food and Agriculture (Slade). We thank the following individuals for help and guidance with these studies: Dr. S. Melville (Virginia Tech) and Dr. C. Caswell (Virginia Tech) for critical insight into bacterial genetics; Dr. J. Lemkul (Virginia Tech) for critical manuscript insights; Melissa Makris from the Virginia-Maryland School of Veterinary Medicine for imaging flow cytometry. Select figures were made with a paid subscription of Biorender.com.

## Author contributions

*Michael A. Casasanta*, Data curation, Methodology, Formal Analysis, Writing-review and editing; *Christopher C. Yoo*, Data curation, Methodology, Formal Analysis, Writing-review and editing; *Barath Udayasuryan*, Data curation, Methodology, Formal Analysis, Writing-review and editing; *Blake E. Sanders*, Data curation, Writing-review and editing; *Ariana Umaña*, Data curation, Writing-review and editing; *Yao Zhang*, Data curation, Writing-review and editing; *Huaiyao Peng*, Data curation, Writing-review and editing; *A. Jane Duncan*, Data curation, Writing-review and editing; *Yueying Wang*, Data curation, Writing-review and editing; *Liwu Li*, Conceptualization, Formal analysis, Supervision, Funding acquisition, Validation, Methodology, Writing-review and editing; *Scott S. Verbridge*, Conceptualization, Formal analysis, Supervision, Funding acquisition, Validation, Methodology, Project administration, review and editing; *Daniel J. Slade*, Conceptualization, Data curation, Formal analysis, Supervision, Funding acquisition, Validation, Methodology, Project administration, Writing-original draft, review and editing.

## Competing interests

The authors declare that they have no conflicts of interest with the contents of this article.

## Data and materials availability

Materials are available upon reasonable request or in the future through the Addgene plasmid repository. All data needed to evaluate conclusions are presented in the paper or Supplementary Materials, but additional raw data can be accessed on our Open Science Framework repository at: <https://osf.io/kbj2h/>

## Author ORCIDs

Michael A. Casasanta: <https://orcid.org/0000-0001-6614-9623>

Christopher C. Yoo: <https://orcid.org/0000-0003-0274-7960>

Barath Udayasuryan: <https://orcid.org/0000-0003-1543-7873>

Blake E. Sanders: <https://orcid.org/0000-0002-5841-122X>

Ariana Umaña: <https://orcid.org/0000-0002-1941-8656>

Scott S. Verbridge: <https://orcid.org/0000-0002-4074-8799>

Daniel J. Slade: <https://orcid.org/0000-0001-5634-7220>

634  
635  
636  
637  
638  
639  
640  
641  
642  
643  
644  
645  
646  
647  
648

## **SUPPLEMENTARY MATERIALS**

**Fig. S1. Utilizing the Leloir pathway for targeted gene deletions in bacteria.**

**Fig. S2. Development of vector for markerless gene deletion in *Fusobacterium nucleatum*.**

**Fig. S3. Deletion of the *galKT* gene operon in *F. nucleatum* 23726.**

**Fig. S4. Target gene deletion in *F. nucleatum* 23726  $\Delta galKT$ .**

**Fig. S5. Validation of markerless *fap2* and *fadA* gene deletions in *F. nucleatum* 23726  $\Delta galKT$ .**

**Fig. S6. Complementation of gene deletions at the static *arsB* gene site in *F. nucleatum* 23726.**

**Fig. S7. Human and mouse cytokine arrays to detect *F. nucleatum* induced immune signaling.**

**Table S1. Primer list.**

**Table S2. Construct list.**

**Table S3. Bacterial strains list.**

649  
650

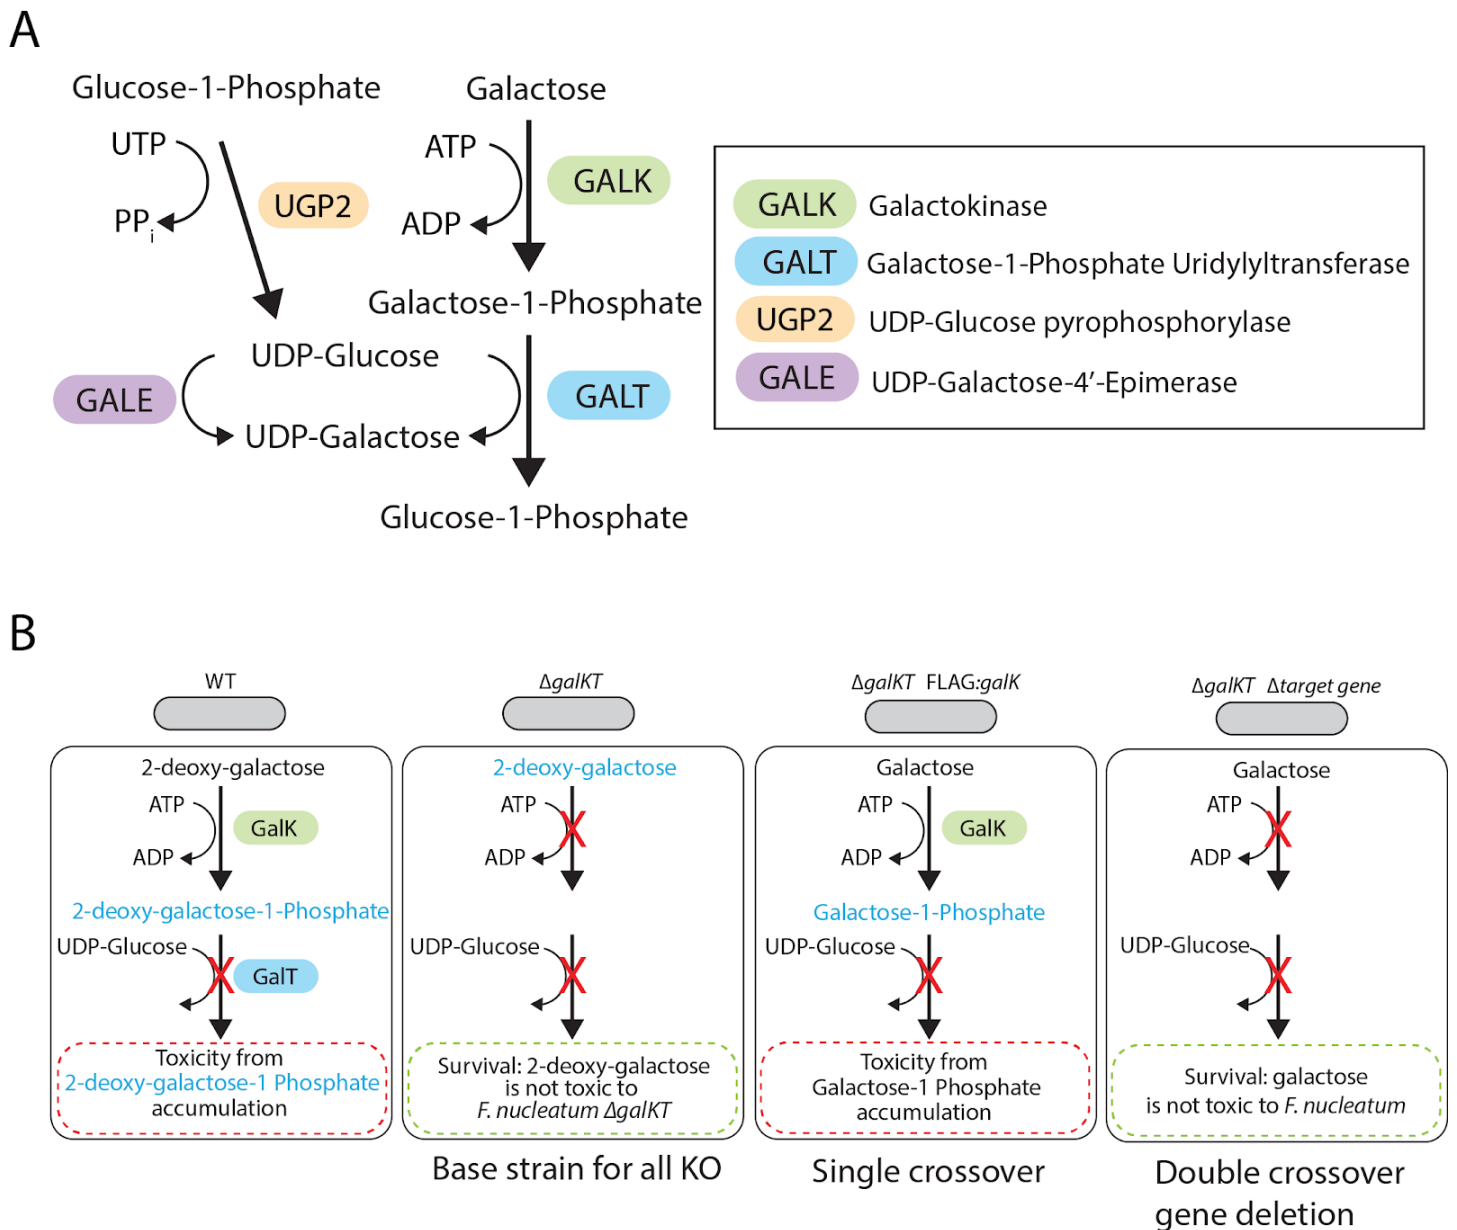

651  
652  
653  
654  
655  
656

**Fig. S1. Utilizing the Leloir pathway for targeted gene deletions in bacteria. (A)** The Leloir pathway of galactose catabolism. **(B)** Graphical representation of the different selection stages of *F. nucleatum* gene deletions and how the GalK and GalT affect cellular survival in the presence of galactose and 2-deoxy-galactose.

657

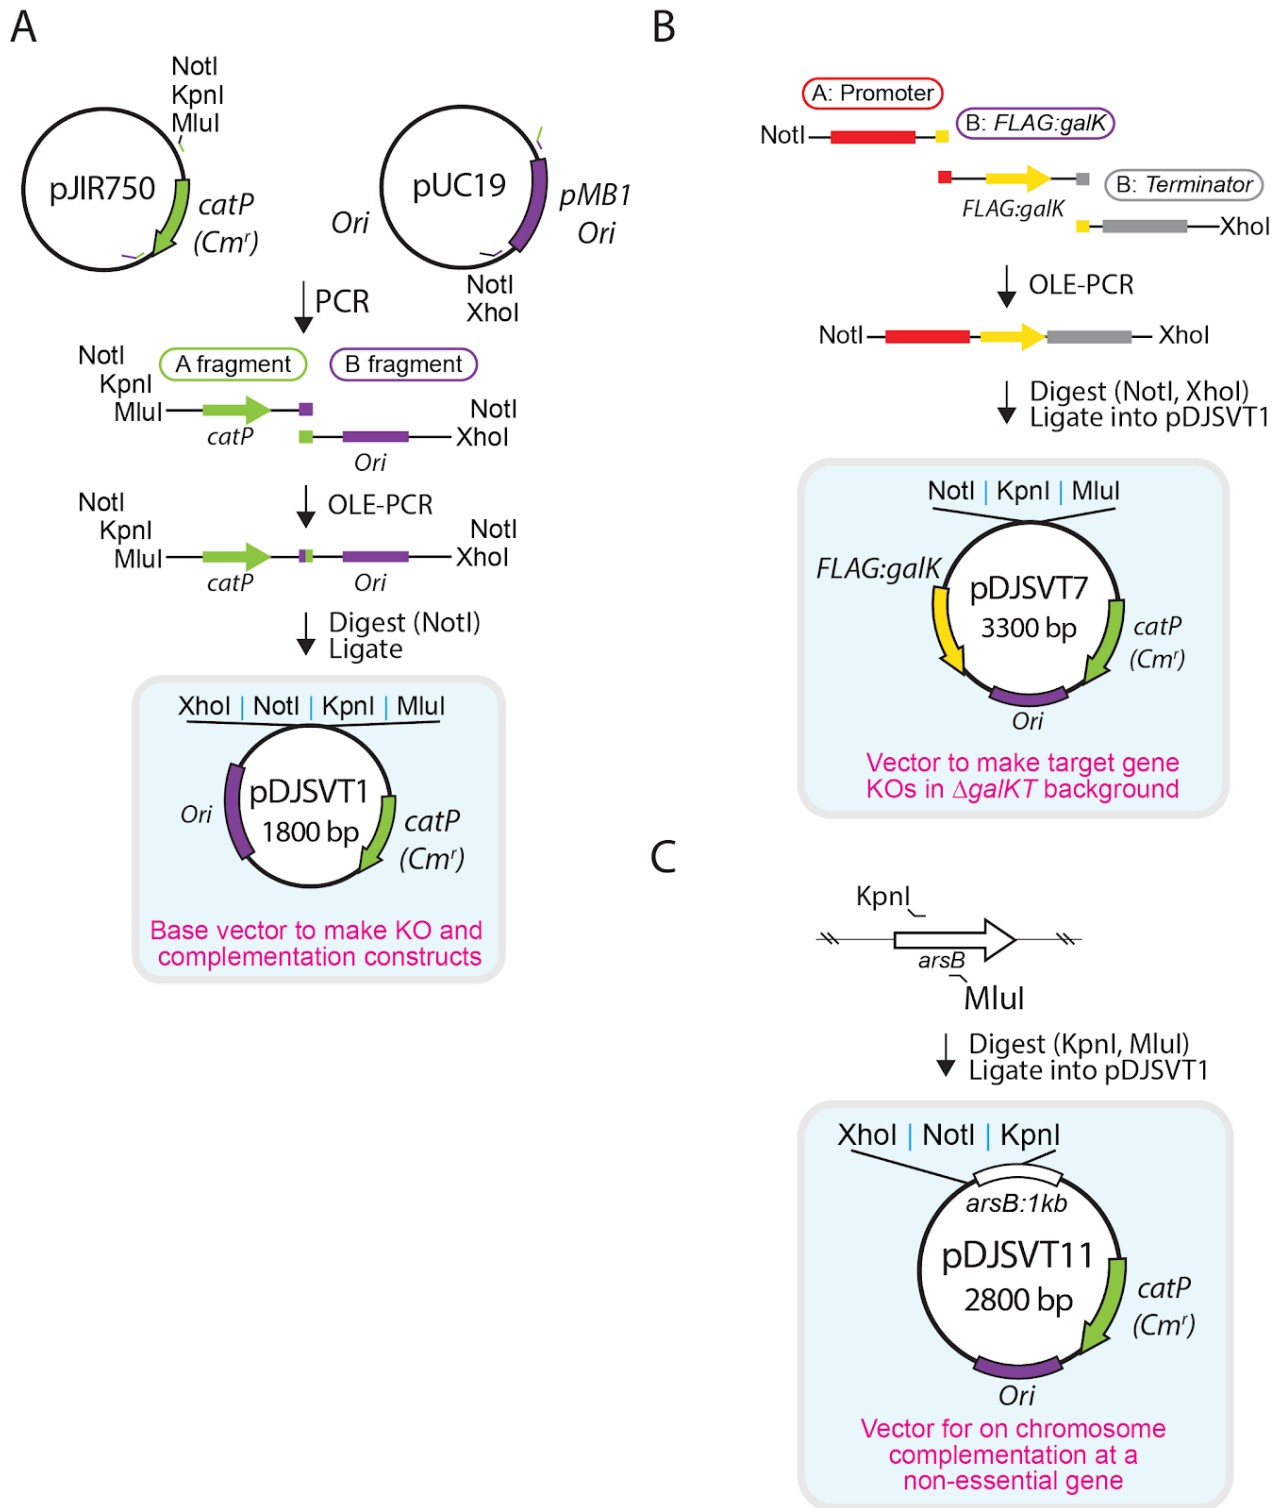

658

659

660

661

662

663

664

**Fig. S2. Development of vector for markerless gene deletion in *Fusobacterium nucleatum*.** (A) Method to create pDJSVT1; the base vector for all gene deletion constructs that consists of an *E. coli* origin and chloramphenicol/thiamphenicol resistance and a GC rich multiple cloning site for efficient cloning of AT rich *F. nucleatum* DNA. (B) pDJSVT7 plasmid incorporation of a constitutively active *FLAG:galk* gene for selection on 2-deoxy-galactose. (C) Development of a chromosomal complementation vector that incorporates the entire pDJSVT11 plasmid onto the chromosome at the *arsB* gene in *F. nucleatum* 23726.

665

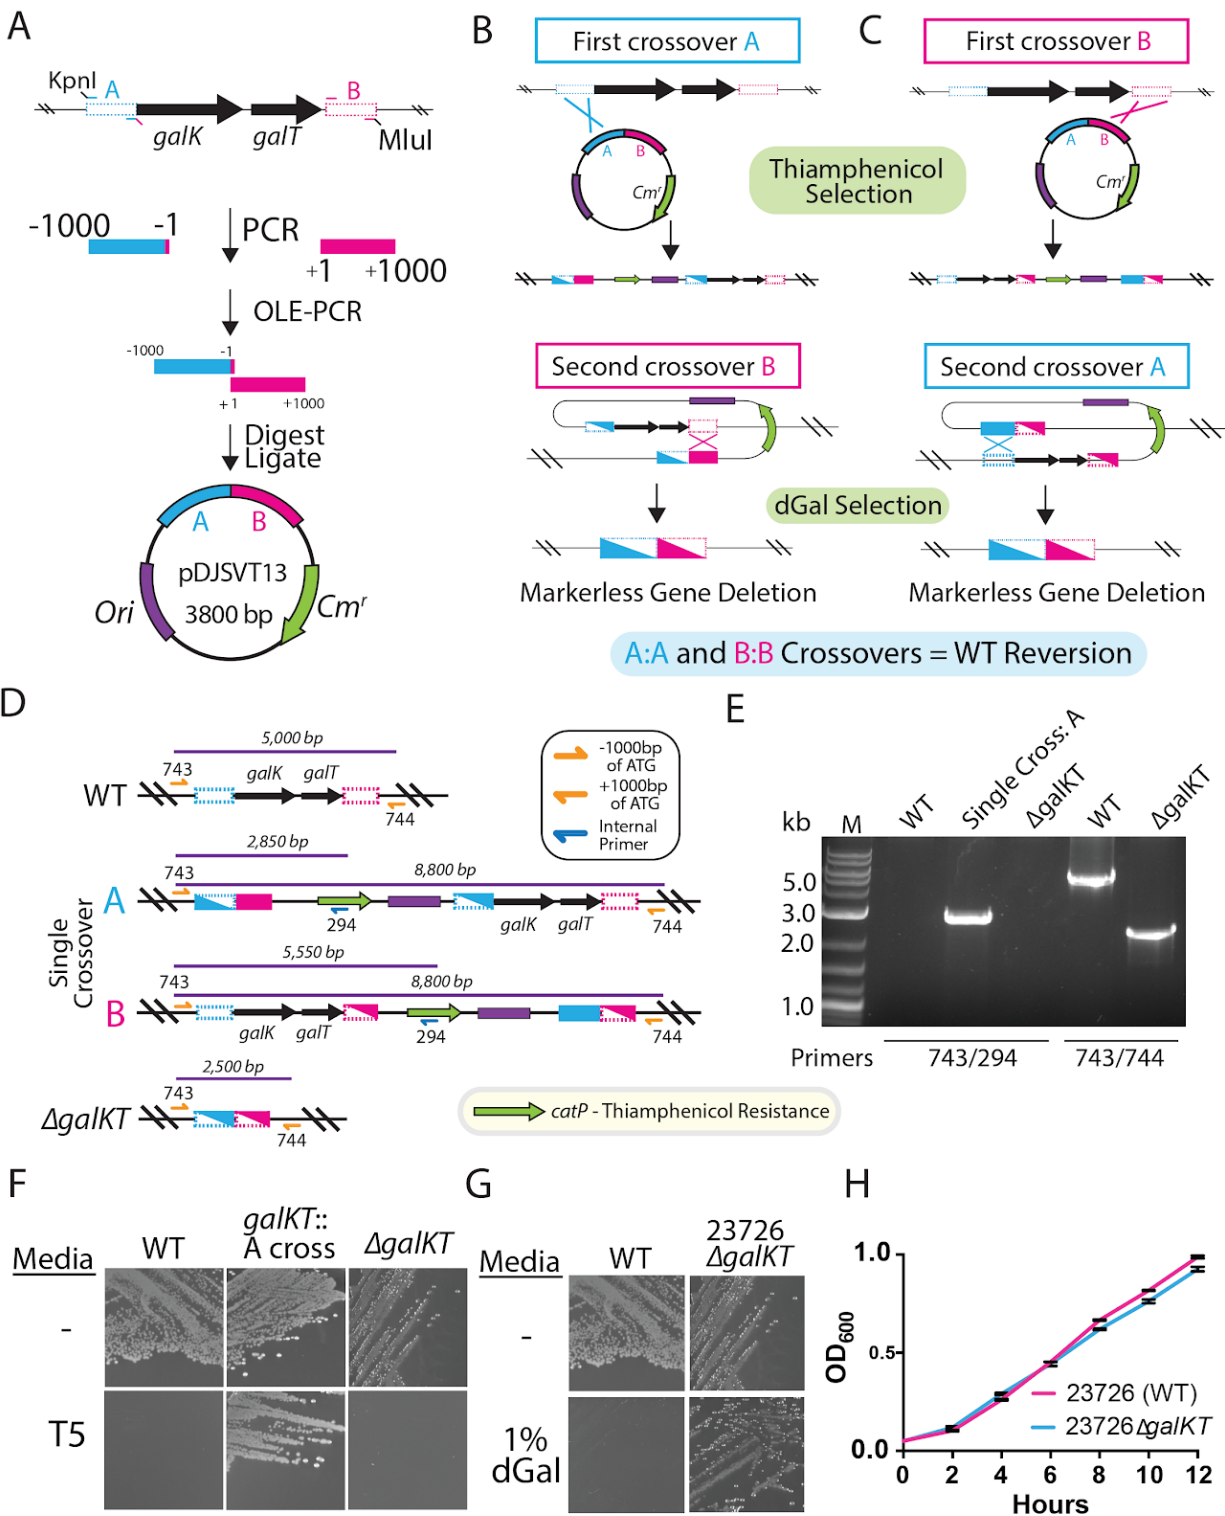

666  
667  
668  
669  
670  
671  
672  
673  
674

**Fig. S3. Deletion of the *galKT* gene operon in *F. nucleatum* 23726.** (A) Development of pDJSVT13, the plasmid for *galKT* gene deletion, by inserting 1000 bp *galKT* flanking sequences into pDJSVT1. (B) Representation of single-crossover homologous recombination onto the *F. nucleatum* 23726 chromosome with either the A (upstream) or (C) B (downstream) 1000 bp DNA fragments in pDJSVT13 followed by showing how the double crossover results in complete plasmid excision. (D) Map of chromosomal plasmid incorporation after the initial single-crossover insertion. (E) PCR verification of single-cross pDJSVT13 and subsequent double-crossover deletion of the *galKT* operon. (F) Plating on 5 μg/mL thiamphenicol (T5) (single-crossover selection) and (G) 1% 2-deoxy-galactose (double-crossover), resulting in *galKT* operon deletion. (H) Validation that *F. nucleatum* 23726  $\Delta galKT$  grows the same as WT *F. nucleatum* 23726.



675

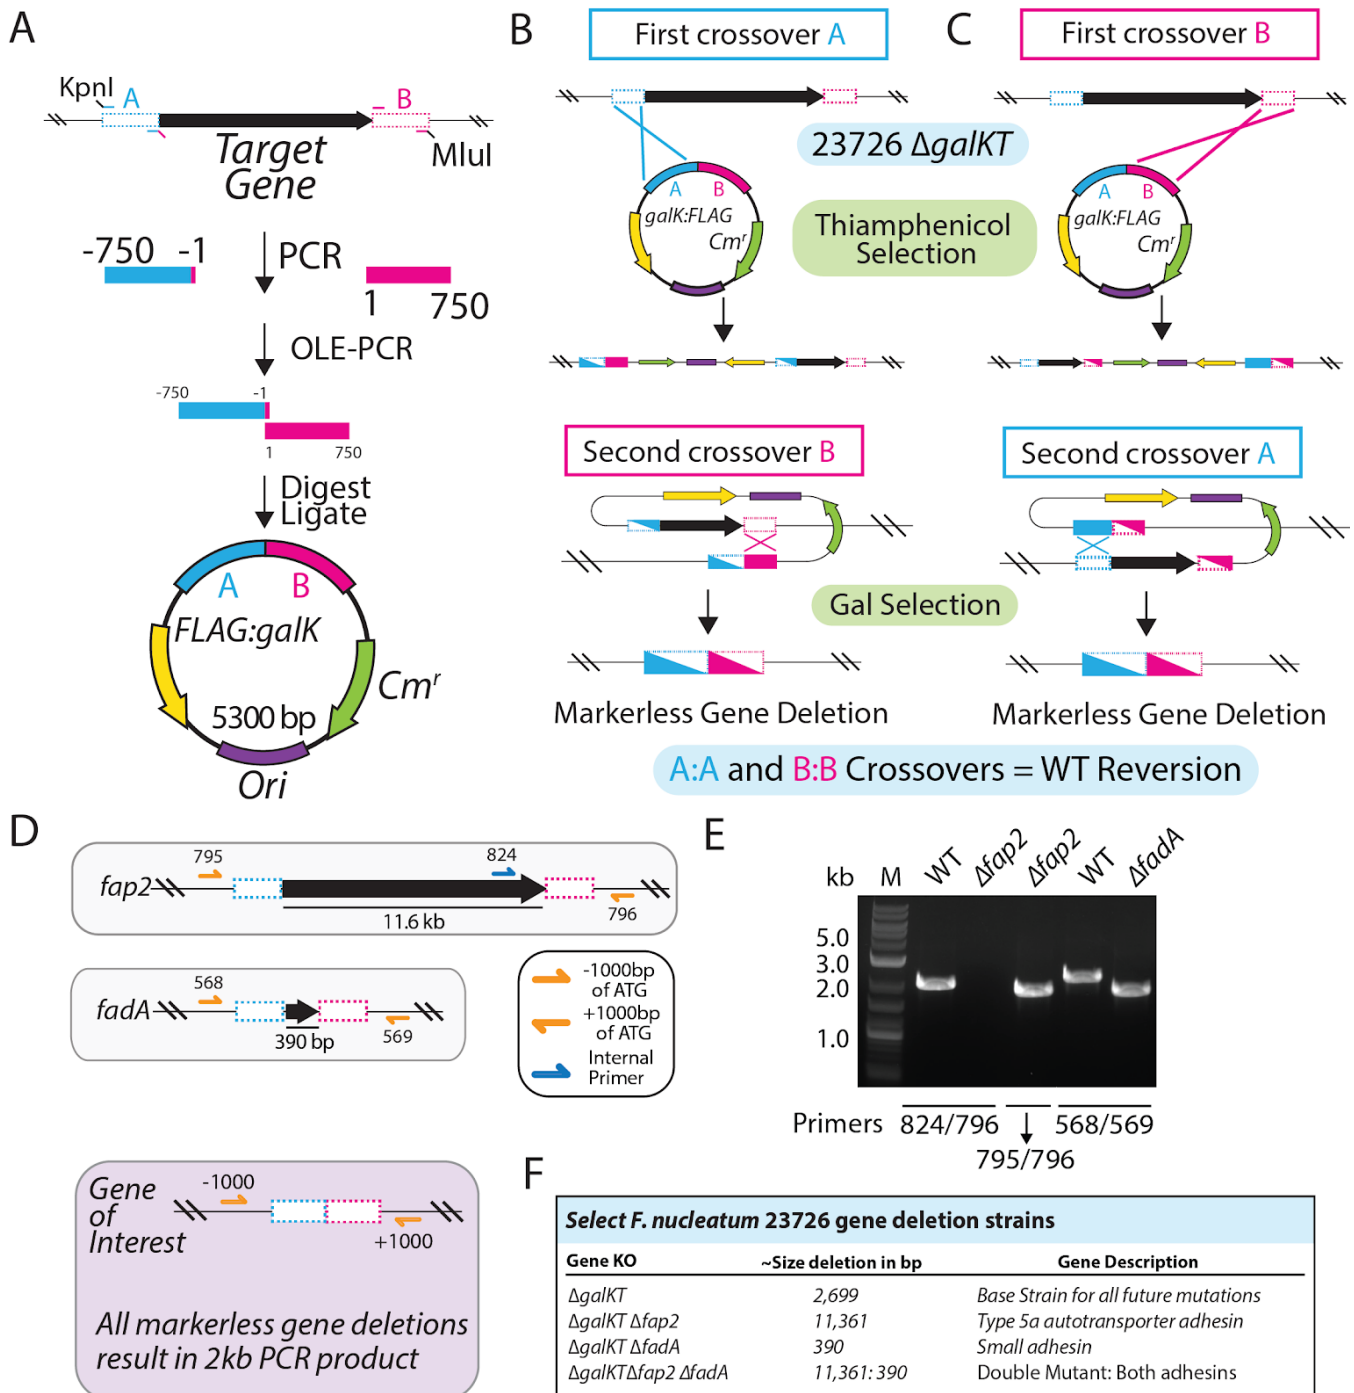

676

677

678

679

680

681

682

683

**Fig. S4. Target gene deletion in *F. nucleatum* 23726  $\Delta galkT$ .** (A) Development of all target gene deletion plasmids (Table S2) by inserting 750 bp from target gene flanking sequences into pDJSVT7. (B) Representation of single-crossover homologous recombination onto the *F. nucleatum* 23726 chromosome with either the A (upstream) or (C) B (downstream) 750 bp DNA fragments. Double crossover results are shown during complete plasmid excision. (D) *fap2* and *fadA* as examples of gene excision. KO validation primers are shown flanking genes at -1000 and +1000 bp. This results in 2kb PCR products as shown in (E) for the *fap2* and *fadA* gene deletions. (F) Table of select deleted genes in this study and their function.

684

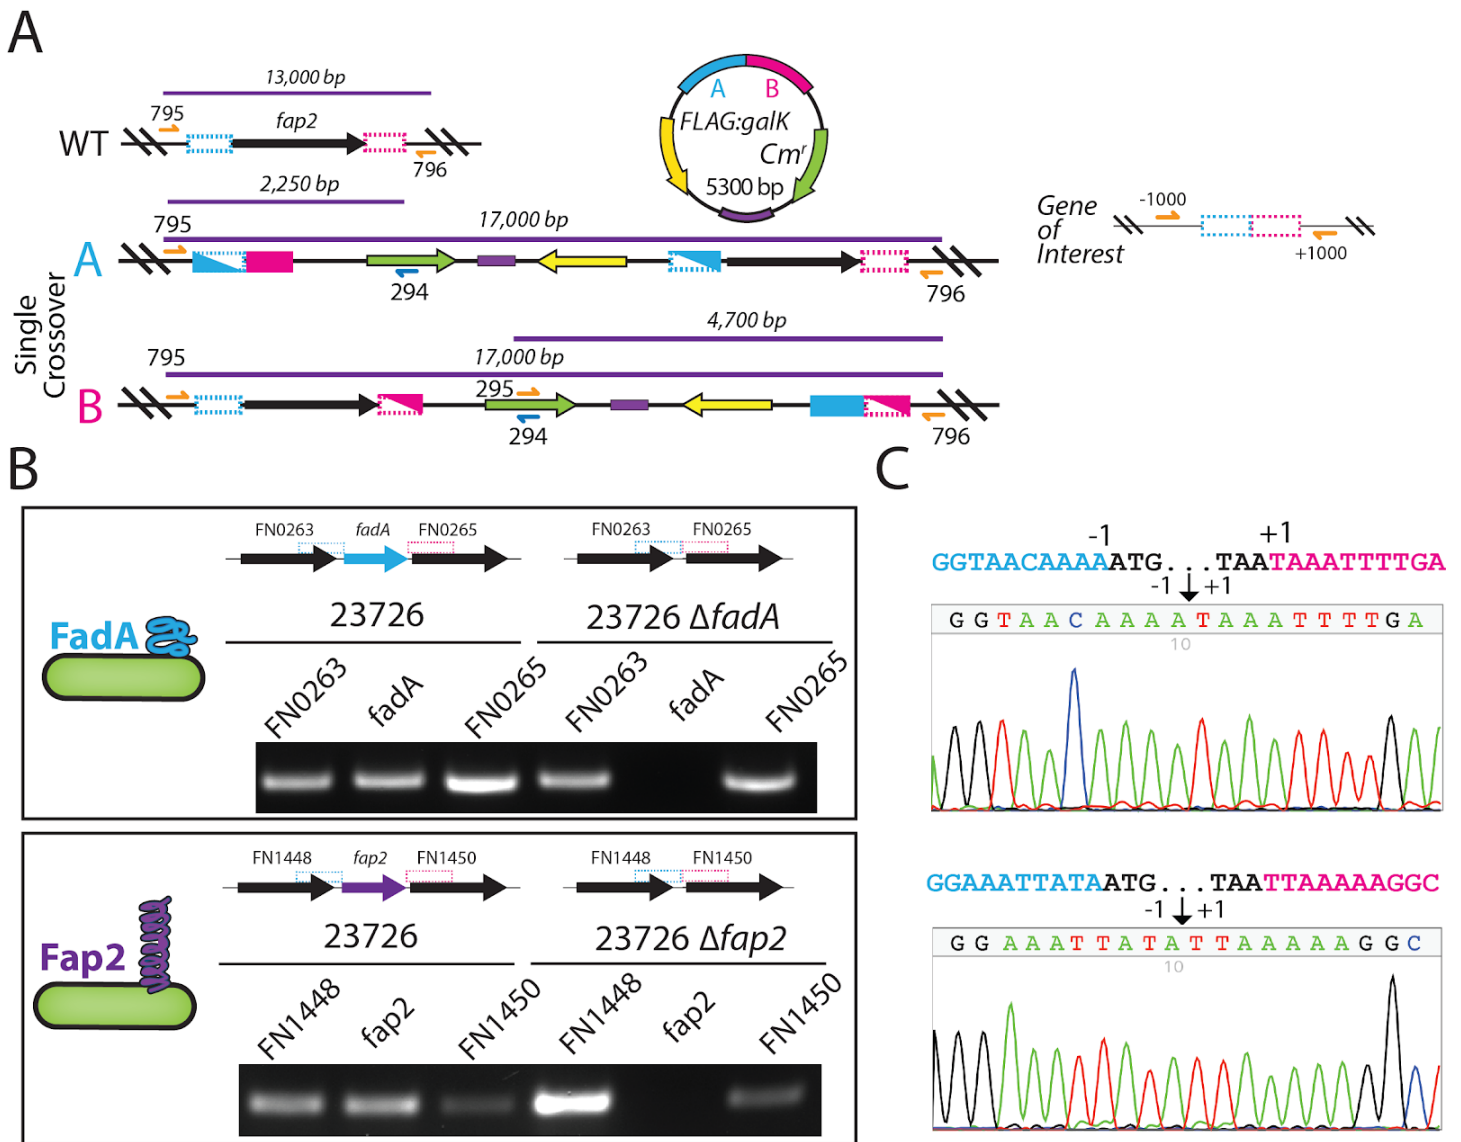

685

686

687

688

689

690

**Fig. S5. Validation of markerless *fap2* and *fadA* gene deletions in *F. nucleatum* 23726  $\Delta galKT$ .** (A) Map of chromosomal plasmid incorporation after the initial single-crossover insertion for *fap2*. (B) RT-PCR of *fadA* and *fap2* with their two surrounding genes showing loss of gene transcription due to gene deletion. (C) DNA sequencing with primers sitting -250 and +250 from the start codon of *fadA* and *fap2*. All constructs created are 100% accurate and show perfect excision and reinsertion of the genome to the -1 and +1 base for each gene.

691

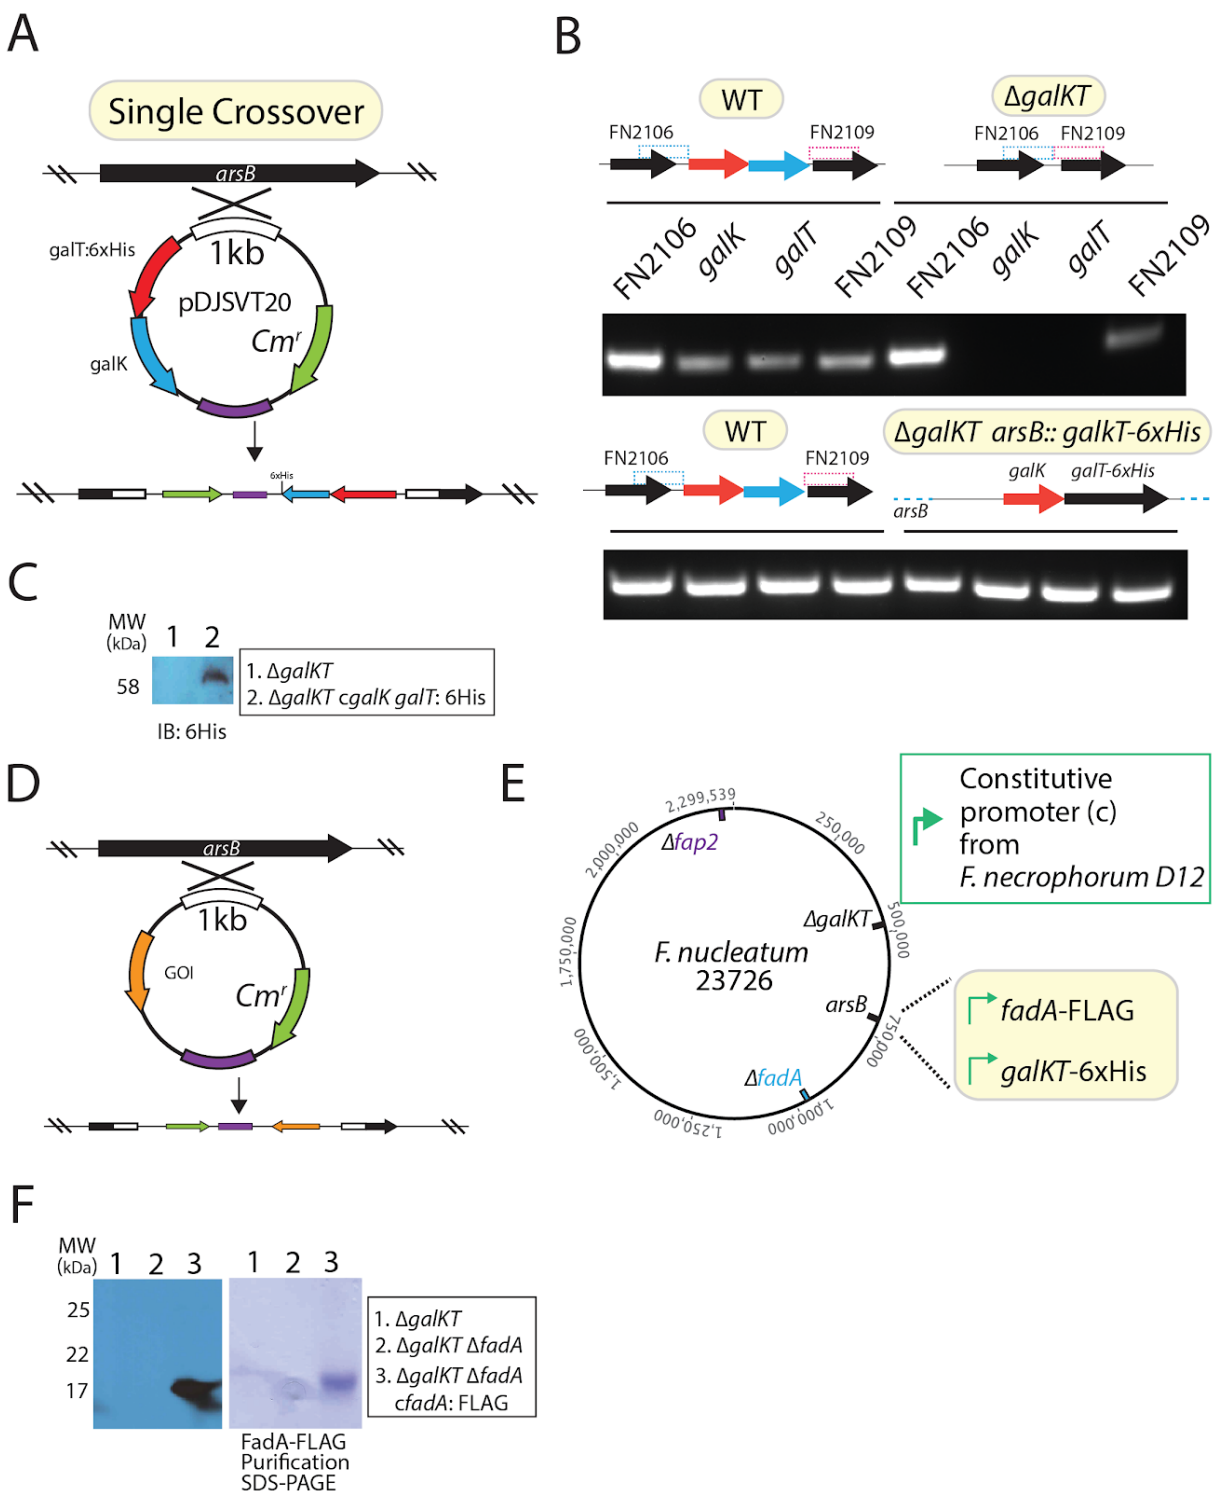

692

693

694

695

696

697

698

699

700

**Fig. S6. Complementation of gene deletions at the static *arsB* gene site in *F. nucleatum* 23726. (A)** pDJSVT20 plasmid created for complementing  $\Delta galKT$  with *galK*::6xHis. **(B)** RT-PCR of  $\Delta galKT$  and  $\Delta galKT galK$ ::6xHis and the two genes flanking the operon (FN2106, FN2109). **(C)** Western blot verification of *galK*::6xHis complementation and constitutive expression of GalT:6xHis. **(D)** pDJSVT11 base vector depicted with target gene of interest (GOI) complementation and how it incorporates into the chromosome at *arsB*. **(E)** Potential sites for complementation of gene deletions used in this study. However, we did not complement the  $\Delta fap2$  strain due to the extreme difficulties of complementing large genes (12kb). **(F)** Complementation of  $\Delta fadA$  with *fadA*::FLAG and western blot verification of constitutive expression of FadA::FLAG.

701

A

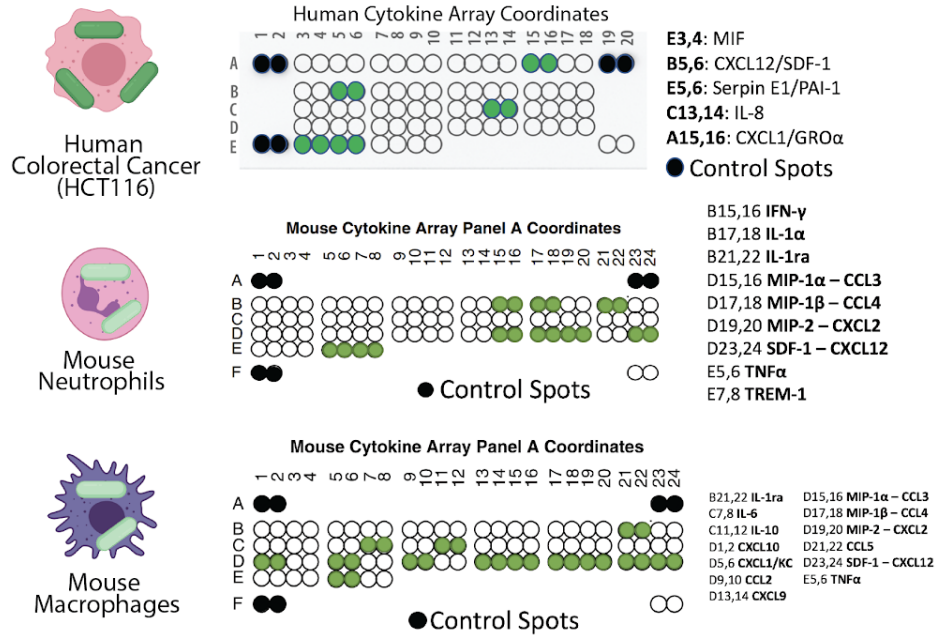

B

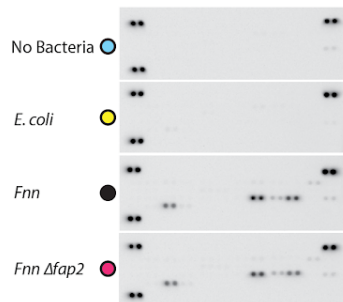

C

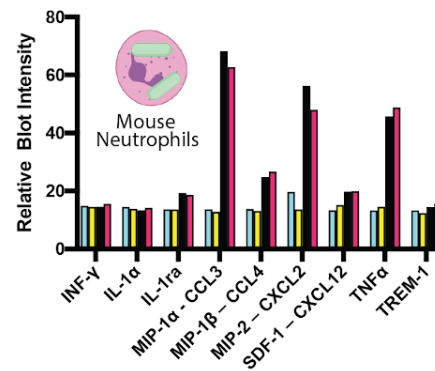

D

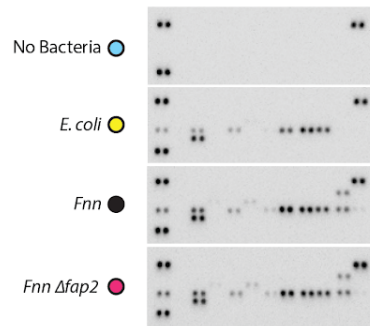

E

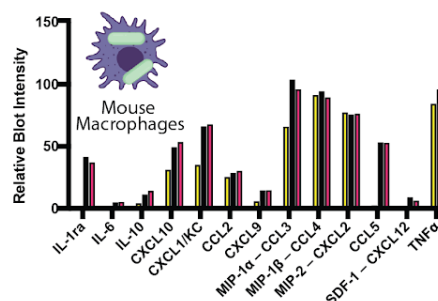

702

703

704

705

706

707

708

709

710

711

**Fig. S7. Human and mouse cytokine arrays to detect *F. nucleatum* induced immune signaling. (A)** Cytokine array coordinates for human and mouse array with green dots representing spots analyzed due to detected expression. Gene names are shown to the right, and full coordinates for all spots can be found at R&D Systems (R&D: Proteome Profiler Human Cytokine Array (ARY005B), Proteome Profiler Mouse Cytokine Array Kit, Panel A (ARY006)). **(B)** Raw blots for mouse cytokines secreted by mouse neutrophils after infection with *F. nucleatum* 23726 at 50:1 MOI for four hours. **(C)** Quantitation of relative spot intensity compared to the control blot of uninfected neutrophils. **(D)** Raw blots for mouse cytokines secreted by mouse macrophages after infection with *F. nucleatum* 23726 at 50:1 MOI for four hours. **(E)** Quantitation of relative spot intensity compared to the control blot of uninfected macrophages.

712  
713

### Supplementary Table 1: Primers used in this study.

| Primer Name | Sequence (5' to 3')                                              | Description                                                                                                                                    |
|-------------|------------------------------------------------------------------|------------------------------------------------------------------------------------------------------------------------------------------------|
| prDJSVT470  | CAGCTC <b>GGCGGCCGCGGTACCACGCGT</b> cgagtga<br>aaaagtgccctagcg   | Forward primer to clone fragment A of construct pDJSVT1: Clones <i>catP</i> out of pJIR750. Has <b>NotI</b> , <b>KpnI</b> , <b>MluI</b> sites. |
| prDJSVT471  | CTAAAGTATATATGAGTAACTTGGTCTGACAGca<br>aggctcttgactaacctgtggttatg | Reverse primer to clone fragment A of construct pDJSVT1: Overlaps with prDJSVT472: beginning of pMB1 ori from pUC19. OLE-PCR.                  |
| prDJSVT472  | ctgtcagaccaagttactcatatatactttag                                 | Forward primer to clone fragment B of construct pDJSVT1: pMB1 ori from pUC19. Overlaps with prDJSVT471: end of <i>catP</i> from pJIR750.       |
| prDJSVT473  | CTCGAT <b>GCGGCCGCTCGAG</b> ccaggaaccgtaaaaag<br>gccgcgttg       | Reverse primer to clone fragment B of construct pDJSVT1: pMB1 ori from pUC19. Has <b>XhoI</b> and <b>NotI</b> sites.                           |
| prDJSVT7239 | ctaga <b>ggtagc</b> TGTTAATCCATTTGCTACTGTTATTGC<br>ATC           | Forward primer -1000bp upstream of <i>galKT</i> in <i>F. nuc</i> 23726. Has a <b>KpnI</b> site. Makes construct pDJSVT13.                      |
| prDJSVT730  | GCCTGCTCCTCCACAACTAATATAGACAAAAAT<br>TCCCCTTCCAAAATAATATTGTAAC   | Reverse primer -1bp upstream of <i>galKT</i> in <i>F. nuc</i> 23726. Overlaps with prDJSVT731 for OLE-PCR. Makes construct pDJSVT13.           |
| prDJSVT731  | GTCTATATTAGTTTGTGGAGGAGCAGGC                                     | Forward primer +1bp downstream of <i>galKT</i> in <i>F. nuc</i> 23726. Overlaps with prDJSVT730 for OLE-PCR. Makes construct pDJSVT13.         |
| prDJSVT732  | gatcgt <b>acgcgt</b> AGCCTCTTATTTAATCTTCATATCCA<br>TTTGG         | Reverse primer +1000bp downstream of <i>galKT</i> in <i>F. nuc</i> 23726. Has an <b>MluI</b> site. Makes construct pDJSVT13.                   |
| prDJSVT743  | GGAGCTTTTGATGCTGGAATGGCAGCTC                                     | Forward confirmation primer -1240 bp upstream of <i>galK</i> (FN2107) in <i>F. nuc</i> 23726.                                                  |
| prDJSVT744  | GAAGAGAAGATGGAAAATGGTTGTTTTATGATG                                | Reverse confirmation primer +1240 bp downstream of <i>galT</i> (FN2108) in <i>F. nuc</i> 23726                                                 |

|            |                                                                           |                                                                                                                                                                                      |
|------------|---------------------------------------------------------------------------|--------------------------------------------------------------------------------------------------------------------------------------------------------------------------------------|
| prDJSVT863 | CATTAGAAATGGCAGGAACAACCTTTTGATAAG                                         | Forward primer -250 <i>galKT F. nuc.</i> 23726 start for sequencing                                                                                                                  |
| prDJSVT864 | CACTTTCTCCAACCAAAGAGAAAGCAGC                                              | Reverse primer +250 <i>galKT F. nuc.</i> 23726 start for sequencing                                                                                                                  |
| prDJSVT753 | ctgactg <b>cgggccgc</b> TTTTAAATCCTTTCTTTTTCACTAA<br>TCTTCTTTTTTC         | Forward primer to put <i>F. nec</i> D12 Promoter (A0A017H3W9: Pseudouridine synthase) on FLAG: <i>galK</i> . Has a <b>NotI</b> site. Makes construct pDJSVT7.                        |
| prDJSVT754 | catcatcatctttataatccatTCCAAACTCCTTATCTTTTTTC<br>TTTTTTAGATG               | Reverse primer to put <i>F. nec</i> D12 Promoter (A0A017H3W9: Pseudouridine synthase) on FLAG: <i>galK</i> . Complementary with prDJSVT745 for OLE-PCR. Makes construct pDJSVT7.     |
| prDJSVT745 | ATG <b>GATTATAAAGATGATGATGATAAA</b> TTAGAAAA<br>TTTAATAAAAGACTTTAAAGAAATT | Forward primer to clone <i>galK</i> out of <i>F. nuc</i> 23726. 5' end has <b>FLAG tag</b> and is complementary to 3' of prDJSVT754. Makes construct pDJSVT7.                        |
| prDJSVT746 | TTATTTACCTTTTCTGCTCCATCTC                                                 | Reverse primer to clone <i>galK</i> out of <i>F. nuc</i> 23726 and into pDJSVT1. Is compatible for OLE-PCR with prDJSVT747 to add a <i>catP</i> terminator. Makes construct pDJSVT7. |
| prDJSVT747 | GAGATGGAGCAGGAAAGGTGAAATAActtcaggttgt<br>ctgtaactaaaaac                   | Forward primer to add <i>catP</i> terminator to <i>galK</i> . OLE with prDJSVT746. Makes construct pDJSVT7.                                                                          |
| prDJSVT748 | cgctcg <b>CTCGAG</b> caaggtctttgtactaacctgtggttatg                        | Reverse primer to add <i>catP</i> terminator to <i>galK</i> . Has an <b>XhoI</b> . Makes construct pDJSVT7.                                                                          |
| prDJSVT776 | ctaga <b>ggtacc</b> GAAACGATACATAGTAGATTAGAAAT<br>ATTGCTCTTACTG           | Forward primer to insert central 1000 bp of <i>F. nuc</i> 23726 <i>arsB</i> (AVQ22750.1) into pDJSVT1. Has a <b>KpnI</b> site. Makes construct pDJSVT11.                             |
| prDJSVT777 | gatcgt <b>acgcgt</b> GTTGCAGAACCTATCATTGTGATACT<br>TCCG                   | Reverse primer to insert central 1000 bp of <i>F. nuc</i> 23726 <i>arsB</i> (AVQ22750.1) into pDJSVT1. Has an <b>MluI</b> site. Makes construct pDJSVT11.                            |
| prDJSVT791 | gagctaga <b>ggtacc</b> GTAGTGATAAAGATGCTGGAAAA                            | Forward primer -750bp upstream                                                                                                                                                       |

|            |                                                                                         |                                                                                                                                       |
|------------|-----------------------------------------------------------------------------------------|---------------------------------------------------------------------------------------------------------------------------------------|
|            | AATACTATTCC                                                                             | of <i>fap2</i> in <i>F. nuc</i> 23726. Has a <b>KpnI</b> site. Makes construct pDJSVT14.                                              |
| prDJSVT792 | CTCTTAATTATGTTAATTGTAAATTTAAGCCTTTTT<br>AAataaattccccctttttatatttttaattatactttttaatatag | Reverse primer -1bp upstream of <i>fap2</i> in <i>F. nuc</i> 23726. Overlaps with prDJSVT793 for OLE-PCR. Makes construct pDJSVT14.   |
| prDJSVT793 | TTAAAAAGGCTTAAATTTACAATTAACATAATTAA<br>GAGAATTTTTTGAG                                   | Forward primer +1bp downstream of <i>fap2</i> in <i>F. nuc</i> 23726. Overlaps with prDJSVT792 for OLE-PCR. Makes construct pDJSVT14. |
| prDJSVT794 | cgatgatcgt <b>acgcgt</b> GCTTGTGTAGAATCATTTCCTGTT<br>AACAAAC                            | Reverse primer +750bp downstream of <i>fap2</i> in <i>F. nuc</i> 23726. Has an <b>MluI</b> site. Makes construct pDJSVT14.            |
| prDJSVT795 | gaagatattccagaaaaaatgatagtagaaaaatac                                                    | Forward confirmation primer -1000 bp upstream of <i>fap2</i> in <i>F. nuc</i> 23726.                                                  |
| prDJSVT796 | ggaatttcactccactactaggagtag                                                             | Reverse confirmation primer +1000 bp downstream of <i>fap2</i> in <i>F. nuc</i> 23726                                                 |
| prDJSVT859 | GGAGCAACTCAACCTCTTGCAACTTTATG                                                           | Forward primer -250 <i>fap2 F. nuc</i> . 23726 start for sequencing                                                                   |
| prDJSVT860 | CAGGTCATTCTCATTATAATCTCCCCTTTTTTG                                                       | Reverse primer +250 <i>fap2 F. nuc</i> . 23726 start for sequencing                                                                   |
| prDJSVT582 | ctaga <b>ggtaacc</b> GCAAAGAAGCTCAATATACAAATTA<br>TGAAATTG                              | Forward primer -750bp upstream of <i>fadA</i> in <i>F. nuc</i> 23726. Has a <b>KpnI</b> site. Makes construct pDJSVT15.               |
| prDJSVT565 | CTAGCATTTTTTCAAATTTATTTTGTTACCTCCC<br>AAATTAATTATAATAAATTATTTT                          | Reverse primer -1bp upstream of <i>fadA</i> in <i>F. nuc</i> 23726. Overlaps with prDJSVT566 for OLE-PCR. Makes construct pDJSVT15.   |
| prDJSVT566 | TAAATTTTGAAAAAATGCTAGCATGAAATAAAACC                                                     | Forward primer +1bp downstream of <i>fadA</i> in <i>F. nuc</i> 23726. Overlaps with prDJSVT565 for OLE-PCR. Makes construct pDJSVT15. |
| prDJSVT567 | gatcgt <b>acgcgt</b> CAGCATAATCAAGTCCTGTATTGGCA<br>TTATTTAAG                            | Reverse primer +750bp downstream of <i>fadA</i> in <i>F. nuc</i> 23726. Has an <b>MluI</b> site. Makes construct pDJSVT15.            |

|            |                                                                                          |                                                                                                                                                |
|------------|------------------------------------------------------------------------------------------|------------------------------------------------------------------------------------------------------------------------------------------------|
| prDJSVT568 | CAAATACATAAACAAATACTTAACATAAGTTTACT<br>ATG                                               | Forward confirmation primer -1000<br>bp upstream of <i>fadA</i> in <i>F. nuc</i><br>23726.                                                     |
| prDJSVT569 | CAAATACATAAACAAATACTTAACATAAGTTTACT<br>ATG                                               | Reverse confirmation primer -1000<br>bp upstream of <i>fadA</i> in <i>F. nuc</i><br>23726.                                                     |
| prDJSVT867 | GAGGCAAGAGAACTATACTTGCAGATGTTAAAA<br>G                                                   | Forward primer -250 <i>fadA</i> <i>F. nuc</i> .<br>23726 start for sequencing                                                                  |
| prDJSVT858 | GCTACAACCTGTAATTACAACCTGCATAAAACACTC                                                     | Reverse primer +250 <i>fadA</i> <i>F. nuc</i> .<br>23726 start for sequencing                                                                  |
| prDJSVT576 | ctaga <b>ggtagc</b> CCAATATTTGCAATAATATTAGCAAG<br>GTTAC                                  | Forward primer -750bp upstream<br>of <i>cbpF</i> in <i>F. nuc</i> 23726. Has a<br><b>KpnI</b> site. Makes construct<br>pDJSVT16.               |
| prDJSVT577 | GATTAGAGGTGCAGTTTAAATTTTACAAAATTCTC<br>TCCTAATAAAATATTTATATAATC                          | Reverse primer -1bp upstream of<br><i>cbpF</i> in <i>F. nuc</i> 23726. Overlaps<br>with prDJSVT578 for OLE-PCR.<br>Makes construct pDJSVT16.   |
| prDJSVT578 | GTAAAATTTAAACTGCACCTCTAATCTTATG                                                          | Forward primer +1bp downstream<br>of <i>cbpF</i> in <i>F. nuc</i> 23726. Overlaps<br>with prDJSVT577 for OLE-PCR.<br>Makes construct pDJSVT16. |
| prDJSVT579 | gatcgt <b>acgcgt</b> GGAGAACAGGAAGTATTAACCTCATT<br>TTCTTTG                               | Reverse primer +750bp<br>downstream of <i>cbpF</i> in <i>F. nuc</i><br>23726. Has an <b>MluI</b> site.<br>Makes construct pDJSVT16.            |
| prDJSVT580 | CAAGATTATTTAGTTTACATGTTCCATTTG                                                           | Forward confirmation primer -1000<br>bp upstream of <i>cbpF</i> in <i>F. nuc</i><br>23726.                                                     |
| prDJSVT581 | CAAAGAACTTAATAAGATGGGTAAAAGTATTATTC                                                      | Reverse confirmation primer -1000<br>bp upstream of <i>cbpF</i> in <i>F. nuc</i><br>23726.                                                     |
| prDJSVT940 | gagctagaggtaccAGCTCTAAAAGCATAAATAGACAA<br>GATTAGTAATAATAAAG                              | Forward primer -750bp upstream<br>of <i>fccB</i> in <i>F. nuc</i> 23726. Has a<br><b>KpnI</b> site. Makes construct<br>pDJSVT17.               |
| prDJSVT941 | GATTTTTTAAATCTGCAATTGGCTTTTTTTTATTCAT<br>TAAAATACCTCCTTAAGTAAAATATTATTTTTTTA<br>TATGTTTC | Reverse primer -1bp upstream of<br><i>fccB</i> in <i>F. nuc</i> 23726. Overlaps<br>with prDJSVT942 for OLE-PCR.<br>Makes construct pDJSVT17.   |
| prDJSVT942 | AATGAATAAAAAAAGCCAATTGCAGATTTAAAAAA<br>TC                                                | Forward primer +1bp downstream<br>of <i>fccB</i> in <i>F. nuc</i> 23726. Overlaps                                                              |



|            |                                                                     |                                                                                                                                       |
|------------|---------------------------------------------------------------------|---------------------------------------------------------------------------------------------------------------------------------------|
|            |                                                                     | with prDJSVT941 for OLE-PCR. Makes construct pDJSVT17.                                                                                |
| prDJSVT943 | cgatgatcgtagcgcgtGATGGTAAAGCTGTTATTTTAAGTGAATTAGAC                  | Reverse primer +750bp downstream of <i>fvbB</i> in <i>F. nuc</i> 23726. Has an <i>MluI</i> site. Makes construct pDJSVT17.            |
| prDJSVT944 | CCAAACTTTTTGGCTAGTCCCTACCTC                                         | Forward confirmation primer -1000 bp upstream of <i>fvbB</i> in <i>F. nuc</i> 23726.                                                  |
| prDJSVT945 | GTTGAAAAAATGGTTTTTCTGTTGTAAGAGATTTTG                                | Reverse confirmation primer -1000 bp upstream of <i>fvbB</i> in <i>F. nuc</i> 23726.                                                  |
| prDJSVT946 | CTTCTATCATAGCTTCTCCTAATTTTATTTATCTCTC                               | Forward primer -250 <i>fvbB</i> <i>F. nuc</i> . 23726 start for sequencing                                                            |
| prDJSVT947 | GAAACTAGCTTTAATATTGCGACAAAGTAAGAAC                                  | Reverse primer +250 <i>fvbB</i> <i>F. nuc</i> . 23726 start for sequencing                                                            |
| prDJSVT948 | gagctagaggtaccCCAATAGTCTTTACTTAACACATAACCTAATTC                     | Forward primer -750bp upstream of <i>fvbC</i> in <i>F. nuc</i> 23726. Has a <i>KpnI</i> site. Makes construct pDJSVT18.               |
| prDJSVT949 | CCCTAATCTTTAAGAGTGCAGTTTTTTCATTAATAACCTCCTTAAGTAAAACATTATTTTTTATATG | Reverse primer -1bp upstream of <i>fvbC</i> in <i>F. nuc</i> 23726. Overlaps with prDJSVT950 for OLE-PCR. Makes construct pDJSVT18.   |
| prDJSVT950 | AATGAAAAAACTGCACTCTTAAAGATTAGGG                                     | Forward primer +1bp downstream of <i>fvbC</i> in <i>F. nuc</i> 23726. Overlaps with prDJSVT949 for OLE-PCR. Makes construct pDJSVT18. |
| prDJSVT951 | cgatgatcgtagcgcgtGTATTAAGATGAAGTAATGGAGGAGTAATTATTATG               | Reverse primer +750bp downstream of <i>fvbC</i> in <i>F. nuc</i> 23726. Has an <i>MluI</i> site. Makes construct pDJSVT18.            |
| prDJSVT952 | CTTTTGATTATTCCCCCTCATTTTAACTCCTATC                                  | Forward confirmation primer -1000 bp upstream of <i>fvbC</i> in <i>F. nuc</i> 23726.                                                  |
| prDJSVT953 | GGAATTATAGCAACAGATAGAAGAAAAAGACATAAAG                               | Reverse confirmation primer -1000 bp upstream of <i>fvbC</i> in <i>F. nuc</i> 23726.                                                  |
| prDJSVT954 | GAACTAATTTTCATAGGAGTAAATTTAAGTCCATC                                 | Forward primer -250 <i>fvbC</i> <i>F. nuc</i> . 23726 start for sequencing                                                            |
| prDJSVT955 | CAGAAAAAATTATAAAGTAGAAATGAACTGAAA                                   | Reverse primer +250 <i>fvbC</i> <i>F. nuc</i> .                                                                                       |

|                                                             |                                                             |                                                                                                                                       |
|-------------------------------------------------------------|-------------------------------------------------------------|---------------------------------------------------------------------------------------------------------------------------------------|
|                                                             | TG                                                          | 23726 start for sequencing                                                                                                            |
| prDJSVT876                                                  | gagctaga <b>ggtacc</b> GTAATCATAATAATCAGGTGGAACTTTTAAAGAAG  | Forward primer -750bp upstream of <i>fvbD</i> in <i>F. nuc</i> 23726. Has a <b>KpnI</b> site. Makes construct pDJSVT19.               |
| prDJSVT877                                                  | TTCTTCTTCTTTTTTCTACACGCTAAAAAACTCCCCCCTAAATAAAATTTTATTTTAA  | Reverse primer -1bp upstream of <i>fvbD</i> in <i>F. nuc</i> 23726. Overlaps with prDJSVT878 for OLE-PCR. Makes construct pDJSVT19.   |
| prDJSVT878                                                  | AGCGTGTAGAAAAAGAAGAAGAAAATAAAATG                            | Forward primer +1bp downstream of <i>fvbD</i> in <i>F. nuc</i> 23726. Overlaps with prDJSVT877 for OLE-PCR. Makes construct pDJSVT19. |
| prDJSVT879                                                  | cgatgatcgt <b>acgcgt</b> GGAAGATATGAAGAAGAAAATGATTTACCTTGGG | Reverse primer +750bp downstream of <i>fvbD</i> in <i>F. nuc</i> 23726. Has an <b>MluI</b> site. Makes construct pDJSVT19.            |
| prDJSVT880                                                  | GGGTTGCTATGGAGAATGTAATTTCTGTGC                              | Forward confirmation primer -1000 bp upstream of <i>fvbD</i> in <i>F. nuc</i> 23726.                                                  |
| prDJSVT881                                                  | GTTATATTGGTTTGCCAGAGATGAAAAATTAAAAAG                        | Reverse confirmation primer -1000 bp upstream of <i>fvbD</i> in <i>F. nuc</i> 23726.                                                  |
| prDJSVT882                                                  | GGAAAAAGCAAAAACAAAAGATATAGTTACTG                            | Forward primer -250 <i>fvbD</i> <i>F. nuc</i> . 23726 start for sequencing                                                            |
| prDJSVT883                                                  | GATATTGGAGCTCTTGTGGTATGCTCATATTATG                          | Reverse primer +250 <i>fvbD</i> <i>F. nuc</i> . 23726 start for sequencing                                                            |
| <b>Beginning of RT-PCR primers for gene KO confirmation</b> |                                                             |                                                                                                                                       |
| prDJSVT966                                                  | CAACTGAATTTATTGCAGGTATGAGTAAAGGTG                           | Forward Primer for RT-PCR of FN2106, gene upstream of <i>galK</i>                                                                     |
| prDJSVT967                                                  | CAAAAGTTGTTCTGCCATTTCTAATGTTAC                              | Reverse Primer for RT-PCR of FN2106, gene upstream of <i>galK</i>                                                                     |
| prDJSVT968                                                  | GAGCGACTCATGCAGTTACTGAAAATG                                 | Forward Primer for RT-PCR of FN2107, <i>galK</i>                                                                                      |
| prDJSVT969                                                  | CATAGTCATTTTCAACTATGCTTACAGTACAAC                           | Reverse Primer for RT-PCR of FN2107, <i>galK</i>                                                                                      |
| prDJSVT970                                                  | GTTATGGGACTTGCAGTTTTACCAGG                                  | Forward Primer for RT-PCR of FN2108, <i>galT</i>                                                                                      |
| prDJSVT971                                                  | CTTTTAAATACTCCTGCATCTTCAAGAACTC                             | Reverse Primer for RT-PCR of                                                                                                          |

|            |                                    |                                                                     |
|------------|------------------------------------|---------------------------------------------------------------------|
|            |                                    | FN2108, <i>galT</i>                                                 |
| prDJSVT972 | GCTTTAAATAGATTAAGAAATGGTGGAGATAGCC | Forward Primer for RT-PCR of FN2109, gene downstream of <i>galT</i> |
| prDJSVT973 | GCCAGTTCCAAGCAGTTTCAATAATTTGTTC    | Forward Primer for RT-PCR of FN2109, gene downstream of <i>galT</i> |
| prDJSVT845 | GTTGAAAACACAAATATAGAAGAAAATGTATTG  | Forward Primer for RT-PCR of FN0263, gene upstream of <i>fadA</i>   |
| prDJSVT846 | CTAGTGCCGGATGAATTTCTGTCCAC         | Reverse Primer for RT-PCR of FN0263, gene upstream of <i>fadA</i>   |
| prDJSVT847 | GTAGGTGAATTACAAGCATTAGATGCTG       | Forward Primer for RT-PCR of FN0264, <i>fadA</i>                    |
| prDJSVT848 | CCATTTCCAGATTCTAATTTCTTTAAAGCATC   | Reverse Primer for RT-PCR of FN0264, <i>fadA</i>                    |
| prDJSVT849 | CCCTTTAACAGATTCATTGGTAATCTCAG      | Forward Primer for RT-PCR of FN0265, gene downstream of <i>fadA</i> |
| prDJSVT850 | GGCATTATTTAAGAATTCTATTGCTACTCC     | Reverse Primer for RT-PCR of FN0265, gene downstream of <i>fadA</i> |
| prDJSVT851 | GGAGTAGCTGATGGAAAATTCAATATTCAAG    | Forward Primer for RT-PCR of FN1448, gene upstream of <i>fap2</i>   |
| prDJSVT852 | GCTCCTGAACTGAAATCCATACTTGG         | Reverse Primer for RT-PCR of FN1448, gene upstream of <i>fap2</i>   |
| prDJSVT853 | GGTTGTAAATGAATCAACAGCAGTTGG        | Forward Primer for RT-PCR of FN1449, <i>fap2</i>                    |
| prDJSVT854 | CATTCCTATTCCCTTTTCGCCTGATAAAG      | Reverse Primer for RT-PCR of FN1449, <i>fap2</i>                    |
| prDJSVT855 | GACACTTAGCAAGTGAATTTCAAGATTTAAG    | Forward Primer for RT-PCR of FN1450, gene downstream of <i>fap2</i> |
| prDJSVT856 | CCTAAAATTAAGAATAATACTCCAAACGGATATC | Reverse Primer for RT-PCR of FN1450, gene downstream of <i>fap2</i> |

714  
715  
716

717  
718

## Supplementary Table 2: Plasmids used in this study.

| Plasmid Name | Description                                                                                                                                                                                                                                   | Source or Reference |
|--------------|-----------------------------------------------------------------------------------------------------------------------------------------------------------------------------------------------------------------------------------------------|---------------------|
| pUC19        | High copy <i>E. coli</i> plasmid                                                                                                                                                                                                              | [1]                 |
| pJIR750      | Base <i>C. perfringens</i> - <i>E. coli</i> shuttle vector to make <i>F. nucleatum</i> shuttle vectors. (Cm <sup>r</sup> Tm <sup>r</sup> )                                                                                                    | [2]                 |
| pDJSVT1      | Base vector for creating all <i>F. nucleatum</i> gene deletion plasmids. (Cm <sup>r</sup> Tm <sup>r</sup> )                                                                                                                                   | This study          |
| pDJSVT7      | Vector containing a <i>FLAG:galk</i> gene to make double crossover gene deletions in a $\Delta$ <i>galkT</i> background. (Cm <sup>r</sup> Tm <sup>r</sup> )                                                                                   | This study          |
| pDJSVT11     | Chromosomal complementation vector for <i>F. nucleatum</i> 23726. Incorporates a plasmid within the chromosomal <i>arsB</i> gene using homologous recombination. (Cm <sup>r</sup> Tm <sup>r</sup> )                                           | This study          |
| pDJSVT13     | <i>galkT</i> gene deletion vector for <i>F. nucleatum</i> 23726. (Cm <sup>r</sup> Tm <sup>r</sup> )                                                                                                                                           | This study          |
| pDJSVT14     | <i>fap2</i> gene deletion vector for <i>F. nucleatum</i> 23726 (Cm <sup>r</sup> Tm <sup>r</sup> )                                                                                                                                             | This study          |
| pDJSVT15     | <i>fadA</i> gene deletion vector for <i>F. nucleatum</i> 23726 (Cm <sup>r</sup> Tm <sup>r</sup> )                                                                                                                                             | This study          |
| pDJSVT16     | <i>cbpF</i> gene deletion vector for <i>F. nucleatum</i> 23726 (Cm <sup>r</sup> Tm <sup>r</sup> )                                                                                                                                             | This study          |
| pDJSVT17     | <i>fvcB</i> gene deletion vector for <i>F. nucleatum</i> 23726 (Cm <sup>r</sup> Tm <sup>r</sup> )                                                                                                                                             | This study          |
| pDJSVT18     | <i>fvcC</i> gene deletion vector for <i>F. nucleatum</i> 23726 (Cm <sup>r</sup> Tm <sup>r</sup> )                                                                                                                                             | This study          |
| pDJSVT19     | <i>fvcD</i> gene deletion vector for <i>F. nucleatum</i> 23726 (Cm <sup>r</sup> Tm <sup>r</sup> )                                                                                                                                             | This study          |
| pDJSVT20     | Chromosomal complementation vector for <i>galkT::6xHis</i> in <i>F. nucleatum</i> 23726. Incorporates a plasmid within the chromosomal <i>arsB</i> gene expressing <i>galkT::6xHis</i> to complement strain DJSVT02 ( $\Delta$ <i>galkT</i> ) | This study          |

|  |                                        |  |
|--|----------------------------------------|--|
|  | <i>(Cm<sup>r</sup> Tm<sup>r</sup>)</i> |  |
|--|----------------------------------------|--|

719 *Cm<sup>r</sup>* , Chloramphenicol resistance

720 *Tm<sup>r</sup>* , Thiamphenicol resistance

721

722 1. Yanisch-Perron, C., Vieira, J. and Messing, J. (1985). *Gene*. 33, 103-119.

723 2. Bannam TL, Rood JI. Clostridium perfringens-Escherichia coli shuttle vectors that carry single antibiotic  
724 resistance determinants. *Plasmid*. 1993;29: 233–235.

725

726

727

728

729  
730

### Supplementary Table 3: Bacterial strains used in this study.

| Strain                                                        | Bacterial Species   | Genotype and Characteristics                                                                                                                                                                                                | Source or Reference |
|---------------------------------------------------------------|---------------------|-----------------------------------------------------------------------------------------------------------------------------------------------------------------------------------------------------------------------------|---------------------|
| Top10                                                         | <i>E. coli</i>      | <i>mcrA</i> , $\Delta(mrr-hsdRMS-mcrBC)$ , Phi80(del)M15, $\Delta lacX74$ , <i>deoR</i> , <i>recA1</i> , <i>araD139</i> , $\Delta(ara-leu)7697$ , <i>galU</i> , <i>galK</i> , <i>rpsL</i> (SmR), <i>endA1</i> , <i>nupG</i> | Invitrogen          |
| <i>F. nucleatum</i> subsp. <i>nucleatum</i> ATCC 23726        | <i>F. nucleatum</i> | Wild Type                                                                                                                                                                                                                   | ATCC, [1-4]         |
| <i>F. nucleatum</i> subsp. <i>animalis</i> 7_1 ( <i>Fna</i> ) | <i>F. nucleatum</i> | Wild Type                                                                                                                                                                                                                   | [4]                 |
| DJSVT02 ( <i>Fnn</i> )                                        | <i>F. nucleatum</i> | <i>F. nucleatum</i> 23726 $\Delta galKT$<br><i>In-frame deletion of galK and galT genes (Base strain for all target in-frame gene deletions)</i>                                                                            | This paper          |
| DJSVT03                                                       | <i>F. nucleatum</i> | <i>F. nucleatum</i> 23726 $\Delta galKT fap2$<br><i>In-frame deletion of fap2 in the DJSVT02 background</i>                                                                                                                 | This paper          |
| DJSVT04                                                       | <i>F. nucleatum</i> | <i>F. nucleatum</i> 23726 $\Delta galKT fadA$<br><i>In-frame deletion of fadA in the DJSVT02 background</i>                                                                                                                 | This paper          |
| DJSVT05                                                       | <i>F. nucleatum</i> | <i>F. nucleatum</i> 23726 $\Delta galKT fap2 fadA$<br><i>In-frame deletions of fap2 and fadA in the DJSVT02 background</i>                                                                                                  | This paper          |
| DJSVT06                                                       | <i>F. nucleatum</i> | <i>F. nucleatum</i> 23726 $\Delta galKT cbpF$<br><i>In-frame deletion of cbpF in the DJSVT02 background</i>                                                                                                                 | This paper          |
| DJSVT07                                                       | <i>F. nucleatum</i> | <i>F. nucleatum</i> 23726 $\Delta galKT fvcB$<br><i>In-frame deletion of fvcB in the DJSVT02 background</i>                                                                                                                 | This paper          |
| DJSVT08                                                       | <i>F. nucleatum</i> | <i>F. nucleatum</i> 23726 $\Delta galKT fvcC$<br><i>In-frame deletion of fvcC in the DJSVT02 background</i>                                                                                                                 | This paper          |
| DJSVT09                                                       | <i>F. nucleatum</i> | <i>F. nucleatum</i> 23726 $\Delta galKT fvcD$<br><i>In-frame deletion of fvcD in the DJSVT02 background</i>                                                                                                                 | This paper          |
| DJSVT10                                                       | <i>F. nucleatum</i> | <i>F. nucleatum</i> 23726 $\Delta galKT cbpF fvcB fvcC fvcD$<br><i>In-frame quadruple deletion of cbpF, fvcB, fvcC, and fvcD in the DJSVT02 background</i>                                                                  | This paper          |

|                                                          |                          |                                                                                                                                                                              |            |
|----------------------------------------------------------|--------------------------|------------------------------------------------------------------------------------------------------------------------------------------------------------------------------|------------|
| DJSVT11                                                  | <i>F. nucleatum</i>      | <i>F. nucleatum</i> 23726 $\Delta galKT$ <i>fap2 cbpF fvcB fvcC fvcD</i><br><i>In-frame quintuple deletion of fap2, cbpF, fvcB, fvcC, and fvcD in the DJSVT02 background</i> | This paper |
| DJSVT12                                                  | <i>F. nucleatum</i>      | <i>F. nucleatum</i> 23726 $\Delta galKT$ <i>arsB::galKT-6xHis Cm<sup>r</sup> Tm<sup>r</sup></i><br>Complemented strain of $\Delta galKT$                                     | This paper |
| DJSVT13                                                  | <i>F. nucleatum</i>      | <i>F. nucleatum</i> 23726 $\Delta galKT \Delta fadA$ <i>arsB::fadA-FLAG Cmr</i><br>Complemented strain of $\Delta fadA$                                                      | This paper |
| <i>F. nucleatum</i> subsp. <i>polymorphum</i> ATCC 10953 | <i>F. nucleatum</i>      | Wild Type<br><i>Used to make pan-Fusobacterium antisera in rabbits. Antisera name: DJSVT_MAS1</i>                                                                            | ATCC       |
| <i>F. nucleatum</i> subsp. <i>vincentii</i> ATCC 49256   | <i>F. nucleatum</i>      | Wild Type<br><i>Used to make pan-Fusobacterium antisera in rabbits. Antisera name: DJSVT_MAS1</i>                                                                            | ATCC       |
| <i>F. periodonticum</i> 2_1_31                           | <i>F. periodonticum</i>  | Wild Type<br><i>Used to make pan-Fusobacterium antisera in rabbits. Antisera name: DJSVT_MAS1</i>                                                                            | [4]        |
| <i>F. varium</i> 27725                                   | <i>F. varium</i>         | Wild Type<br><i>Used to make pan-Fusobacterium antisera in rabbits. Antisera name: DJSVT_MAS1</i>                                                                            | [4]        |
| <i>F. ulcerans</i> 49185                                 | <i>F. ulcerans</i>       | Wild Type<br><i>Used to make pan-Fusobacterium antisera in rabbits. Antisera name: DJSVT_MAS1</i>                                                                            | [4]        |
| <i>F. mortiferum</i> 9817                                | <i>F. mortiferum</i>     | Wild Type<br><i>Used to make pan-Fusobacterium antisera in rabbits. Antisera name: DJSVT_MAS1</i>                                                                            | [4]        |
| <i>F. gonidiaformans</i> 25563                           | <i>F. gonidiaformans</i> | Wild Type<br><i>Used to make pan-Fusobacterium antisera in rabbits. Antisera name: DJSVT_MAS1</i>                                                                            | [4]        |
| <i>F. necrophorum</i> subsp. <i>necrophorum</i> 25286    | <i>F. necrophorum</i>    | Wild Type<br><i>Used to make pan-Fusobacterium antisera in rabbits. Antisera name: DJSVT_MAS1</i>                                                                            | ATCC       |
| <i>F. necrophorum</i> subsp. <i>funduliforme</i> 1_1_36S | <i>F. necrophorum</i>    | Wild Type<br><i>Used to make pan-Fusobacterium antisera in rabbits. Antisera name: DJSVT_MAS1</i>                                                                            | [4]        |
| <i>F. nucleatum</i> subsp. <i>nucleatum</i> ATCC 25586   | <i>F. nucleatum</i>      | Wild Type<br><i>Used in cytokine induction experiments</i>                                                                                                                   | ATCC       |

731

732

733

*Cm<sup>r</sup>*, Chloramphenicol resistance  
*Tm<sup>r</sup>*, Thiamphenicol resistance

- 734 1. Knorr M. *Über die fusospirilläre Symbiose, die Gattung Fusobacterium (KB Lehmann) und Spirillum*  
735 *sputigenum. Zugleich ein Beitrag zur Bakteriologie der Mundhöhle. II. Mitteilung Die Gattung*  
736 *Fusobacterium I Abt Orig Zentralbl Bakteriol Parasitenkd Infektionskr Hyg. 1922;89: 4–22.*  
737
- 738 2. Knorr M. *Ueber die fusospirilläre symbiose, die Gattung Fusobacterium (KB Lehmann) und Spirillum*  
739 *sputigenum. II Mitteilung. Die Gattung Fusobacterium. Zentbl Bakteriol Parasitenkd Infekt Hyg Abt.*  
740 *1923;1: 4–22.*  
741
- 742 3. Dzink JL, Sheenan MT, Socransky SS. *Proposal of three subspecies of Fusobacterium nucleatum*  
743 *Knorr 1922: Fusobacterium nucleatum subsp. nucleatum subsp. nov., comb. nov.; Fusobacterium*  
744 *nucleatum subsp. polymorphum subsp. nov., nom. Rev., comb. nov.; and Fusobacterium nucleatum*  
745 *subsp. vincentii subsp. nov., nom. rev., comb. nov. Int J Syst Evol Microbiol. Microbiology Society;*  
746 *1990;40: 74–78.*  
747
- 748 4. Manson McGuire A, Cochrane K, Griggs AD, Haas BJ, Abeel T, Zeng Q, et al. *Evolution of invasion*  
749 *in a diverse set of Fusobacterium species. MBio. 2014;5: e01864.*  
750  
751  
752



## REFERENCES

1. D. van Elsland, J. Neefjes, Bacterial infections and cancer. *EMBO Rep.* **19** (2018), doi:10.15252/embr.201846632.
2. A. Gagnaire, B. Nadel, D. Raoult, J. Neefjes, J.-P. Gorvel, Collateral damage: insights into bacterial mechanisms that predispose host cells to cancer. *Nat. Rev. Microbiol.* **15**, 109–128 (2017).
3. H. L. Kaufman, F. J. Kohlhapp, A. Zloza, Oncolytic viruses: a new class of immunotherapy drugs. *Nat. Rev. Drug Discov.* **14**, 642–662 (2015).
4. C. A. Brennan, W. S. Garrett, *Fusobacterium nucleatum* - symbiont, opportunist and oncobacterium. *Nat. Rev. Microbiol.* (2018), doi:10.1038/s41579-018-0129-6.
5. Y. W. Han, *Fusobacterium nucleatum*: a commensal-turned pathogen. *Curr. Opin. Microbiol.* **23**, 141–147 (2015).
6. M. R. Rubinstein, X. Wang, W. Liu, Y. Hao, G. Cai, Y. W. Han, *Fusobacterium nucleatum* promotes colorectal carcinogenesis by modulating E-cadherin/ $\beta$ -catenin signaling via its FadA adhesin. *Cell Host Microbe.* **14**, 195–206 (2013).
7. J. Abed, J. E. M. Emgård, G. Zamir, M. Faroja, G. Almogy, A. Grenov, A. Sol, R. Naor, E. Pikarsky, K. A. Atlan, A. Mellul, S. Chaushu, A. L. Manson, A. M. Earl, N. Ou, C. A. Brennan, W. S. Garrett, G. Bachrach, Fap2 Mediates *Fusobacterium nucleatum* Colorectal Adenocarcinoma Enrichment by Binding to Tumor-Expressed Gal-GalNAc. *Cell Host Microbe.* **20**, 215–225 (2016).
8. M. Castellarin, R. L. Warren, J. D. Freeman, L. Dreolini, M. Krzywinski, J. Strauss, R. Barnes, P. Watson, E. Allen-Vercoe, R. A. Moore, R. A. Holt, *Fusobacterium nucleatum* infection is prevalent in human colorectal carcinoma. *Genome Res.* **22**, 299–306 (2012).
9. A. D. Kostic, D. Gevers, C. S. Peadarallu, M. Michaud, F. Duke, A. M. Earl, A. I. Ojesina, J. Jung, A. J. Bass, J. Tabernero, J. Baselga, C. Liu, R. A. Shivdasani, S. Ogino, B. W. Birren, C. Huttenhower, W. S. Garrett, M. Meyerson, Genomic analysis identifies association of *Fusobacterium* with colorectal carcinoma. *Genome Res.* **22**, 292–298 (2012).
10. S. Bullman, C. S. Peadarallu, E. Sicinska, T. E. Clancy, X. Zhang, D. Cai, D. Neuberg, K. Huang, F. Guevara, T. Nelson, O. Chipashvili, T. Hagan, M. Walker, A. Ramachandran, B. Diosdado, G. Serna, N. Mulet, S. Landolfi, S. Ramon Y Cajal, R. Fasani, A. J. Aguirre, K. Ng, E. Élez, S. Ogino, J. Tabernero, C. S. Fuchs, W. C. Hahn, P. Nuciforo, M. Meyerson, Analysis of *Fusobacterium* persistence and antibiotic response in colorectal cancer. *Science.* **358**, 1443–1448 (2017).
11. S. Chen, T. Su, Y. Zhang, A. Lee, J. He, Q. Ge, L. Wang, J. Si, W. Zhuo, L. Wang, *Fusobacterium nucleatum* promotes colorectal cancer metastasis by modulating KRT7-AS/KRT7. *Gut Microbes*, 1–15 (2020).
12. Y. Chen, Y. Chen, J. Zhang, P. Cao, W. Su, Y. Deng, N. Zhan, X. Fu, Y. Huang, W. Dong, *Fusobacterium nucleatum* Promotes Metastasis in Colorectal Cancer by Activating Autophagy Signaling via the Upregulation of CARD3 Expression. *Theranostics.* **10**, 323–339 (2020).
13. H. Verbeke, S. Struyf, G. Laureys, J. Van Damme, The expression and role of CXC chemokines in colorectal cancer. *Cytokine Growth Factor Rev.* **22**, 345–358 (2011).
14. C. Zhuo, X. Wu, J. Li, D. Hu, J. Jian, C. Chen, X. Zheng, C. Yang, Chemokine (C-X-C motif) ligand 1 is associated with tumor progression and poor prognosis in patients with colorectal cancer. *Biosci. Rep.* **38** (2018), doi:10.1042/BSR20180580.

- 794 15. A. Li, M. L. Varney, R. K. Singh, Constitutive expression of growth regulated oncogene (gro) in human  
795 colon carcinoma cells with different metastatic potential and its role in regulating their metastatic  
796 phenotype. *Clin. Exp. Metastasis*. **21**, 571–579 (2004).
- 797 16. A. Li, M. L. Varney, J. Valasek, M. Godfrey, B. J. Dave, R. K. Singh, Autocrine role of interleukin-8 in  
798 induction of endothelial cell proliferation, survival, migration and MMP-2 production and angiogenesis.  
799 *Angiogenesis*. **8**, 63–71 (2005).
- 800 17. H. Ogata, A. Sekikawa, H. Yamagishi, K. Ichikawa, S. Tomita, J. Imura, Y. Ito, M. Fujita, M. Tsubaki, H.  
801 Kato, T. Fujimori, H. Fukui, GRO $\alpha$  promotes invasion of colorectal cancer cells. *Oncol. Rep.* **24**,  
802 1479–1486 (2010).
- 803 18. D. Wang, H. Sun, J. Wei, B. Cen, R. N. DuBois, CXCL1 Is Critical for Premetastatic Niche Formation and  
804 Metastasis in Colorectal Cancer. *Cancer Res.* **77**, 3655–3665 (2017).
- 805 19. C. Rubie, V. O. Frick, S. Pfeil, M. Wagner, O. Kollmar, B. Kopp, S. Graber, B. M. Rau, M. K. Schilling,  
806 Correlation of IL-8 with induction, progression and metastatic potential of colorectal cancer. *World J.*  
807 *Gastroenterol.* **13**, 4996–5002 (2007).
- 808 20. L.-C. Chen, C.-Y. Hao, Y. S. Y. Chiu, P. Wong, J. S. Melnick, M. Brotman, J. Moretto, F. Mendes, A. P.  
809 Smith, J. L. Bennington, D. Moore, N. M. Lee, Alteration of gene expression in normal-appearing colon  
810 mucosa of APC(min) mice and human cancer patients. *Cancer Res.* **64**, 3694–3700 (2004).
- 811 21. Y. S. Lee, I. Choi, Y. Ning, N. Y. Kim, V. Khatchadourian, D. Yang, H. K. Chung, D. Choi, M. J. LaBonte, R.  
812 D. Ladner, K. C. Nagulapalli Venkata, D. O. Rosenberg, N. A. Petasis, H.-J. Lenz, Y.-K. Hong, Interleukin-8  
813 and its receptor CXCR2 in the tumour microenvironment promote colon cancer growth, progression and  
814 metastasis. *Br. J. Cancer.* **106**, 1833–1841 (2012).
- 815 22. Q. Liu, A. Li, Y. Tian, J. D. Wu, Y. Liu, T. Li, Y. Chen, X. Han, K. Wu, The CXCL8-CXCR1/2 pathways in  
816 cancer. *Cytokine Growth Factor Rev.* **31**, 61–71 (2016).
- 817 23. A. Umaña, B. E. Sanders, C. C. Yoo, M. A. Casasanta, B. Udayasuryan, S. S. Verbridge, D. J. Slade,  
818 Utilizing Whole Fusobacterium Genomes To Identify, Correct, and Characterize Potential Virulence Protein  
819 Families. *J. Bacteriol.* **201** (2019), doi:10.1128/JB.00273-19.
- 820 24. M. Desvaux, A. Khan, S. A. Beatson, A. Scott-Tucker, I. R. Henderson, Protein secretion systems in  
821 Fusobacterium nucleatum: genomic identification of Type 4 piliation and complete Type V pathways brings  
822 new insight into mechanisms of pathogenesis. *Biochim. Biophys. Acta.* **1713**, 92–112 (2005).
- 823 25. N. Dautin, H. D. Bernstein, Protein secretion in gram-negative bacteria via the autotransporter pathway.  
824 *Annu. Rev. Microbiol.* **61**, 89–112 (2007).
- 825 26. C. Gur, Y. Ibrahim, B. Isaacson, R. Yamin, J. Abed, M. Gamliel, J. Enk, Y. Bar-On, N. Stanietsky-Kaynan,  
826 S. Copenhagen-Glazer, N. Shussman, G. Almogy, A. Cuapio, E. Hofer, D. Mevorach, A. Tabib, R.  
827 Ortenberg, G. Markel, K. Miklič, S. Jonjic, C. A. Brennan, W. S. Garrett, G. Bachrach, O. Mandelboim,  
828 Binding of the Fap2 protein of Fusobacterium nucleatum to human inhibitory receptor TIGIT protects  
829 tumors from immune cell attack. *Immunity.* **42**, 344–355 (2015).
- 830 27. M. L. Brewer, D. Dymock, R. L. Brady, B. B. Singer, M. Virji, D. J. Hill, Fusobacterium spp. target human  
831 CEACAM1 via the trimeric autotransporter adhesin CbpF. *J. Oral Microbiol.* **11**, 1565043 (2019).
- 832 28. J. Bassler, B. Hernandez Alvarez, M. D. Hartmann, A. N. Lupas, A domain dictionary of trimeric  
833 autotransporter adhesins. *Int. J. Med. Microbiol.* **305**, 265–275 (2015).
- 834 29. J. Strauss, G. G. Kaplan, P. L. Beck, K. Rioux, R. Panaccione, R. Devinney, T. Lynch, E. Allen-Vercoe,  
835 Invasive potential of gut mucosa-derived Fusobacterium nucleatum positively correlates with IBD status of

- 836 the host. *Inflamm. Bowel Dis.* **17**, 1971–1978 (2011).
- 837 30. Y. Yang, W. Weng, J. Peng, L. Hong, L. Yang, Y. Toiyama, R. Gao, M. Liu, M. Yin, C. Pan, H. Li, B. Guo,  
838 Q. Zhu, Q. Wei, M.-P. Moyer, P. Wang, S. Cai, A. Goel, H. Qin, Y. Ma, Fusobacterium nucleatum Increases  
839 Proliferation of Colorectal Cancer Cells and Tumor Development in Mice by Activating Toll-Like Receptor 4  
840 Signaling to Nuclear Factor- $\kappa$ , Up-Regulating Expression of MicroRNA-21. *Gastroenterology* (2016),  
841 doi:10.1053/j.gastro.2016.11.018.
- 842 31. M. Xu, M. Yamada, M. Li, H. Liu, S. G. Chen, Y. W. Han, FadA from Fusobacterium nucleatum utilizes both  
843 secreted and nonsecreted forms for functional oligomerization for attachment and invasion of host cells. *J.*  
844 *Biol. Chem.* **282**, 25000–25009 (2007).
- 845 32. U. K. Gursoy, E. Könönen, V.-J. Uitto, Intracellular replication of fusobacteria requires new actin filament  
846 formation of epithelial cells. *APMIS.* **116**, 1063–1070 (2008).
- 847 33. M. K. H. Schindler, M. S. Schütz, M. C. Mühlenkamp, S. H. M. Rooijackers, T. Hallström, P. F. Zipfel, I. B.  
848 Autenrieth, Yersinia enterocolitica YadA mediates complement evasion by recruitment and inactivation of  
849 C3 products. *J. Immunol.* **189**, 4900–4908 (2012).
- 850 34. J. Eitel, P. Dersch, The YadA Protein of Yersinia pseudotuberculosis Mediates High-Efficiency Uptake into  
851 Human Cells under Environmental Conditions in Which Invasin Is Repressed. *Infect. Immun.* **70**,  
852 4880–4891 (2002).
- 853 35. C. Wu, A. A. M. Al Mamun, T. T. Luong, B. Hu, J. Gu, J. H. Lee, M. D’Amore, A. Das, H. Ton-That, Forward  
854 Genetic Dissection of Biofilm Development by Fusobacterium nucleatum: Novel Functions of Cell Division  
855 Proteins FtsX and EnvC. *MBio.* **9** (2018), doi:10.1128/mBio.00360-18.
- 856 36. H. Nariya, S. Miyata, M. Suzuki, E. Tamai, A. Okabe, Development and application of a method for  
857 counterselectable in-frame deletion in Clostridium perfringens. *Appl. Environ. Microbiol.* **77**, 1375–1382  
858 (2011).
- 859 37. A. Ikegami, P. Chung, Y. W. Han, Complementation of the fadA mutation in Fusobacterium nucleatum  
860 demonstrates that the surface-exposed adhesin promotes cellular invasion and placental colonization.  
861 *Infect. Immun.* **77**, 3075–3079 (2009).
- 862 38. A. Manson McGuire, K. Cochrane, A. D. Griggs, B. J. Haas, T. Abeel, Q. Zeng, J. B. Nice, H. MacDonald,  
863 B. W. Birren, B. W. Berger, E. Allen-Vercoe, A. M. Earl, Evolution of invasion in a diverse set of  
864 Fusobacterium species. *MBio.* **5**, e01864 (2014).
- 865 39. I. D. Bobanga, F. Allen, N. R. Teich, A. Y. Huang, Chemokines CCL3 and CCL4 Differentially Recruit  
866 Lymphocytes in a Murine Model of Early Metastatic Colon Cancer. *J. Surg. Res.* **186**, 515–516 (2014).
- 867 40. Y. Itatani, K. Kawada, S. Inamoto, T. Yamamoto, R. Ogawa, M. M. Taketo, Y. Sakai, The Role of  
868 Chemokines in Promoting Colorectal Cancer Invasion/Metastasis. *Int. J. Mol. Sci.* **17** (2016),  
869 doi:10.3390/ijms17050643.
- 870 41. V. Papayannopoulos, Neutrophil extracellular traps in immunity and disease. *Nat. Rev. Immunol.* **18**,  
871 134–147 (2018).
- 872 42. M. Doke, H. Fukamachi, H. Morisaki, T. Arimoto, H. Kataoka, H. Kuwata, Nucleases from Prevotella  
873 intermedia can degrade neutrophil extracellular traps. *Mol. Oral Microbiol.* **32**, 288–300 (2017).
- 874 43. B. P. Lima, W. Shi, R. Lux, Identification and characterization of a novel Fusobacterium nucleatum adhesin  
875 involved in physical interaction and biofilm formation with Streptococcus gordonii. *Microbiologyopen.* **6**  
876 (2017), doi:10.1002/mbo3.444.

- 877 44. C. W. Kaplan, R. Lux, S. K. Haake, W. Shi, The Fusobacterium nucleatum outer membrane protein RadD  
878 is an arginine-inhibitable adhesin required for inter-species adherence and the structured architecture of  
879 multispecies biofilm. *Mol. Microbiol.* **71**, 35–47 (2009).
- 880 45. C. W. Kaplan, X. Ma, A. Paranjpe, A. Jewett, R. Lux, S. Kinder-Haake, W. Shi, Fusobacterium nucleatum  
881 Outer Membrane Proteins Fap2 and RadD Induce Cell Death in Human Lymphocytes, ,  
882 doi:10.1128/IAI.00567-10.
- 883 46. Y. Ning, P. C. Manegold, Y. K. Hong, W. Zhang, A. Pohl, G. Lurje, T. Winder, D. Yang, M. J. LaBonte, P. M.  
884 Wilson, R. D. Ladner, H.-J. Lenz, Interleukin-8 is associated with proliferation, migration, angiogenesis and  
885 chemosensitivity in vitro and in vivo in colon cancer cell line models. *Int. J. Cancer.* **128**, 2038–2049  
886 (2011).
- 887 47. E. Cohen-Hillel, I. Yron, T. Meshel, A. Ben-Baruch, Interleukin 8 and cell migration to inflammatory sites:  
888 the regulation of focal adhesion kinase under conditions of migratory desensitization. *Isr. Med. Assoc. J.* **9**,  
889 579–583 (2007).
- 890 48. P.-L. Kuo, K.-H. Shen, S.-H. Hung, Y.-L. Hsu, CXCL1/GRO $\alpha$  increases cell migration and invasion of  
891 prostate cancer by decreasing fibulin-1 expression through NF- $\kappa$ B/HDAC1 epigenetic regulation.  
892 *Carcinogenesis.* **33**, 2477–2487 (2012).
- 893 49. K. Mima, R. Nishihara, Z. R. Qian, Y. Cao, Y. Sukawa, J. A. Nowak, J. Yang, R. Dou, Y. Masugi, M. Song,  
894 A. D. Kostic, M. Giannakis, S. Bullman, D. A. Milner, H. Baba, E. L. Giovannucci, L. A. Garraway, G. J.  
895 Freeman, G. Dranoff, W. S. Garrett, C. Huttenhower, M. Meyerson, J. A. Meyerhardt, A. T. Chan, C. S.  
896 Fuchs, S. Ogino, Fusobacterium nucleatum in colorectal carcinoma tissue and patient prognosis. *Gut*  
897 (2015), doi:10.1136/gutjnl-2015-310101.
- 898 50. K. Nosho, Y. Sukawa, Y. Adachi, M. Ito, K. Mitsuhashi, H. Kurihara, S. Kanno, I. Yamamoto, K. Ishigami,  
899 H. Igarashi, R. Maruyama, K. Imai, H. Yamamoto, Y. Shinomura, Association of Fusobacterium nucleatum  
900 with immunity and molecular alterations in colorectal cancer. *World J. Gastroenterol.* **22**, 557–566 (2016).
- 901 51. T. Yu, F. Guo, Y. Yu, T. Sun, D. Ma, J. Han, Y. Qian, I. Kryczek, D. Sun, N. Nagarsheth, Y. Chen, H. Chen,  
902 J. Hong, W. Zou, J.-Y. Fang, Fusobacterium nucleatum Promotes Chemoresistance to Colorectal Cancer  
903 by Modulating Autophagy. *Cell.* **170**, 548–563.e16 (2017).
- 904 52. C. A. Brennan, W. S. Garrett, Gut Microbiota, Inflammation, and Colorectal Cancer. *Annu. Rev. Microbiol.*  
905 **70**, 395–411 (2016).
- 906 53. A. D. Kostic, E. Chun, L. Robertson, J. N. Glickman, C. A. Gallini, M. Michaud, T. E. Clancy, D. C. Chung,  
907 P. Lochhead, G. L. Hold, E. M. El-Omar, D. Brenner, C. S. Fuchs, M. Meyerson, W. S. Garrett,  
908 Fusobacterium nucleatum potentiates intestinal tumorigenesis and modulates the tumor-immune  
909 microenvironment. *Cell Host Microbe.* **14**, 207–215 (2013).
- 910 54. W. S. Garrett, The gut microbiota and colon cancer. *Science.* **364**, 1133–1135 (2019).
- 911 55. R. Mizuno, K. Kawada, Y. Itatani, R. Ogawa, Y. Kiyasu, Y. Sakai, The Role of Tumor-Associated  
912 Neutrophils in Colorectal Cancer. *Int. J. Mol. Sci.* **20** (2019), doi:10.3390/ijms20030529.
- 913 56. J. Cools-Lartigue, J. Spicer, B. McDonald, S. Gowing, S. Chow, B. Giannias, F. Bourdeau, P. Kubes, L.  
914 Ferri, Neutrophil extracellular traps sequester circulating tumor cells and promote metastasis. *J. Clin.*  
915 *Invest.* (2013), doi:10.1172/JCI67484.
- 916 57. J. Park, R. W. Wysocki, Z. Amoozgar, L. Maiorino, M. R. Fein, J. Jorns, A. F. Schott, Y.  
917 Kinugasa-Katayama, Y. Lee, N. H. Won, E. S. Nakasone, S. A. Hearn, V. Küttner, J. Qiu, A. S. Almeida, N.  
918 Perurena, K. Kessenbrock, M. S. Goldberg, M. Egeblad, Cancer cells induce metastasis-supporting

- 919 neutrophil extracellular DNA traps. *Sci. Transl. Med.* **8**, 361ra138 (2016).
- 920 58. K. Mima, Y. Sukawa, R. Nishihara, Z. R. Qian, M. Yamauchi, K. Inamura, S. A. Kim, A. Masuda, J. A.  
921 Nowak, K. Noshu, A. D. Kostic, M. Giannakis, H. Watanabe, S. Bullman, D. A. Milner, C. C. Harris, E.  
922 Giovannucci, L. A. Garraway, G. J. Freeman, G. Dranoff, A. T. Chan, W. S. Garrett, C. Huttenhower, C. S.  
923 Fuchs, S. Ogino, Fusobacterium nucleatum and T Cells in Colorectal Carcinoma. *JAMA Oncol.* **1**,  
924 653–661 (2015).
- 925 59. R. Kalluri, The biology and function of fibroblasts in cancer. *Nat. Rev. Cancer.* **16**, 582–598 (2016).
- 926 60. Y. Lin, J. Xu, H. Lan, Tumor-associated macrophages in tumor metastasis: biological roles and clinical  
927 therapeutic applications. *J. Hematol. Oncol.* **12**, 76 (2019).
- 928 61. A. S. Abdulmir, R. R. Hafidh, L. K. Mahdi, T. Al-jeboori, F. Abubaker, Investigation into the controversial  
929 association of Streptococcus gallolyticus with colorectal cancer and adenoma. *BMC Cancer.* **9**, 403  
930 (2009).
- 931 62. J. H. Abed, J. Emgård, S. Chaushu, W. Garrett, G. Bachrach, Abstract 3300: Gal-GalNAc overexpressed  
932 in colorectal carcinoma mediates attachment and colonization of Fusobacterium nucleatum utilizing the  
933 Fap2 lectin. *Cancer Res.* **76**, 3300–3300 (2016).
- 934 63. C. N. Spaulding, R. D. Klein, S. Ruer, A. L. Kau, H. L. Schreiber, Z. T. Cusumano, K. W. Dodson, J. S.  
935 Pinkner, D. H. Fremont, J. W. Janetka, H. Remaut, J. I. Gordon, S. J. Hultgren, Selective depletion of  
936 uropathogenic E. coli from the gut by a FimH antagonist. *Nature.* **546**, 528–532 (2017).
- 937 64. L. Harbaum, M. J. Pollheimer, P. Kornprat, R. A. Lindtner, A. Schlemmer, P. Rehak, C. Langner, Keratin 7  
938 expression in colorectal cancer--freak of nature or significant finding? *Histopathology.* **59**, 225–234 (2011).
- 939 65. B. Huang, J. H. Song, Y. Cheng, J. M. Abraham, S. Ibrahim, Z. Sun, X. Ke, S. J. Meltzer, Long non-coding  
940 antisense RNA KRT7-AS is activated in gastric cancers and supports cancer cell progression by  
941 increasing KRT7 expression. *Oncogene.* **35**, 4927–4936 (2016).
- 942 66. S. M. Singel, K. Batten, C. Cornelius, G. Jia, G. Fasciani, S. L. Barron, W. E. Wright, J. W. Shay,  
943 Receptor-interacting protein kinase 2 promotes triple-negative breast cancer cell migration and invasion  
944 via activation of nuclear factor-kappaB and c-Jun N-terminal kinase pathways. *Breast Cancer Res.* **16**,  
945 R28 (2014).
- 946 67. J. Zheng, J. Meng, S. Zhao, R. Singh, W. Song, Campylobacter-induced interleukin-8 secretion in  
947 polarized human intestinal epithelial cells requires Campylobacter-secreted cytolethal distending toxin-  
948 and Toll-like receptor-mediated activation of NF-kappaB. *Infect. Immun.* **76**, 4498–4508 (2008).
- 949 68. A. Kuznik, M. Bencina, U. Svajger, M. Jeras, B. Rozman, R. Jerala, Mechanism of endosomal TLR  
950 inhibition by antimalarial drugs and imidazoquinolines. *J. Immunol.* **186**, 4794–4804 (2011).
- 951 69. W. S. 1. Rasband, ImageJ. Bethesda, MD: US National Institutes of Health. *ht tp://rsb. info. nih. gov/ij*,  
952 1997–2007 (1997).
- 953
